# Supplementary material for: Competition and conversion between pnicogen bonds and hydrogen bonds involving prototype organophosphorus compounds
Source: Royal Society of Chemistry journal article supplement (doi:10.1039/d1cp00474c), 2021-01-01
Supplement: d1cp00474c1.pdf [file d1cp00474c1.pdf]

Supporting Information

**Competition and conversion between pnictogen bond and hydrogen bond  
involving prototype organophosphorus compounds**

Xinyue Jing<sup>1</sup>, Yanli Zeng<sup>1,2</sup>, Xueying Zhang<sup>1,2\*</sup>, Lingpeng Meng<sup>1,2</sup>, Xiaoyan  
Li<sup>1,2\*</sup>

Table S1 Binding energies (kJ·mol<sup>-1</sup>), main geometrical parameters (Å) calculated at the MP2 level for the pnictogen-bonded complexes

Table S2 Binding energies (kJ·mol<sup>-1</sup>), main geometrical parameters (Å) calculated at the MP2 level for the hydrogen-bonded complexes

Table S3 Equilibrium geometries (Å) and zero point vibrational energies (a.u.) at the MP2/aug-cc-pV(T+d)Z level, total energies (a.u.) at the CCSD(T)/aug-cc-pV(T+d)Z//MP2/aug-cc-pV(T+d)Z level for the pnictogen- and hydrogen-bonded complexes

Table S4 Geometries (Å) and imaginary frequencies (cm<sup>-1</sup>) at the MP2/aug-cc-pVTZ level, total energies (a.u.) at the CCSD(T)/aug-cc-pV(T+d)Z//MP2/aug-cc-pVTZ level for the transition states.

Figure S1. Molecular graphs of some points along the CH<sub>3</sub>OPO<sub>2</sub>···HNC → TSb → HNC···CH<sub>3</sub>OPO<sub>2</sub> reaction pathway.

**Table S1** Binding energies (kJ·mol<sup>-1</sup>), main geometrical parameters (Å) calculated at the MP2 level for the pnictogen-bonded complexes<sup>a</sup>

| Complexes                                                      | Basis set       | $\Delta E$          | $d(\text{P}\cdots\text{N})$            | $r_{1\text{C}-5\text{O}}$           | $r_{5\text{O}-6\text{P}}$           | $r_{6\text{P}-7\text{O}}$           | $r_{6\text{P}-8\text{O}}$           | $r_{9\text{N}-10\text{H}}$            | $r_{9\text{N}-11\text{H}}$            | $r_{9\text{N}-12\text{H}}$            |
|----------------------------------------------------------------|-----------------|---------------------|----------------------------------------|-------------------------------------|-------------------------------------|-------------------------------------|-------------------------------------|---------------------------------------|---------------------------------------|---------------------------------------|
| $\text{H}_3\text{N}\cdots\text{CH}_3\text{OPO}_2$              | aug-cc-pVTZ     | -92.5               | 1.9333                                 | 1.4374                              | 1.6108                              | 1.4846                              | 1.4787                              | 1.0156                                | 1.0161                                | 1.0166                                |
|                                                                | aug-cc-pV(T+d)Z | -91.9               | 1.9222                                 | 1.4375                              | 1.6027                              | 1.4763                              | 1.4706                              | 1.0156                                | 1.0160                                | 1.0166                                |
| $\text{H}_2\text{O}\cdots\text{CH}_3\text{OPO}_2$              | aug-cc-pVTZ     | $\Delta E$<br>-44.3 | $d(\text{P}\cdots\text{O})$<br>2.0740  | $r_{1\text{C}-5\text{O}}$<br>1.4425 | $r_{5\text{O}-6\text{P}}$<br>1.5865 | $r_{6\text{P}-7\text{O}}$<br>1.4802 | $r_{6\text{P}-8\text{O}}$<br>1.4746 | $r_{9\text{N}-10\text{H}}$<br>0.9693  | $r_{9\text{N}-11\text{H}}$<br>0.9698  |                                       |
|                                                                | aug-cc-pV(T+d)Z | -43.7               | 2.0497                                 | 1.4420                              | 1.5782                              | 1.4724                              | 1.4670                              | 0.9696                                | 0.9700                                |                                       |
| $\text{HNC}\cdots\text{CH}_3\text{OPO}_2$                      | aug-cc-pVTZ     | $\Delta E$<br>-44.3 | $d(\text{P}\cdots\text{C})$<br>2.0077  | $r_{1\text{C}-5\text{O}}$<br>1.4392 | $r_{5\text{O}-6\text{P}}$<br>1.6005 | $r_{6\text{P}-7\text{O}}$<br>1.4822 | $r_{6\text{P}-8\text{O}}$<br>1.4774 | $r_{11\text{C}-10\text{N}}$<br>1.1622 | $r_{10\text{N}-9\text{H}}$<br>1.0005  |                                       |
|                                                                | aug-cc-pV(T+d)Z | -43.5               | 1.9793                                 | 1.4390                              | 1.5921                              | 1.4745                              | 1.4700                              | 1.1618                                | 1.0005                                |                                       |
| $\text{HCCH}\cdots\text{CH}_3\text{OPO}_2$                     | aug-cc-pVTZ     | $\Delta E$<br>-20.9 | $d(\text{P}\cdots\text{C})$<br>2.8753  | $r_{1\text{C}-5\text{O}}$<br>1.4478 | $r_{5\text{O}-6\text{P}}$<br>1.5832 | $r_{6\text{P}-7\text{O}}$<br>1.4766 | $r_{6\text{P}-8\text{O}}$<br>1.4703 | $r_{9\text{C}-10\text{H}}$<br>1.0637  | $r_{9\text{C}-11\text{C}}$<br>1.2155  | $r_{11\text{C}-12\text{H}}$<br>1.0639 |
|                                                                | aug-cc-pV(T+d)Z | -20.6               | 2.8574                                 | 1.4475                              | 1.5746                              | 1.4685                              | 1.4624                              | 1.0637                                | 1.2156                                | 1.0639                                |
| $\text{H}_3\text{N}\cdots\text{CH}_3\text{PO}_2$               | aug-cc-pVTZ     | $\Delta E$<br>-69.7 | $d(\text{P}\cdots\text{N})$<br>1.9768  | $r_{1\text{C}-5\text{O}}$<br>1.8076 | $r_{5\text{O}-6\text{P}}$<br>1.4877 | $r_{6\text{P}-7\text{O}}$<br>1.4877 | $r_{8\text{N}-9\text{H}}$<br>1.0157 | $r_{8\text{N}-10\text{H}}$<br>1.0157  | $r_{8\text{N}-11\text{H}}$<br>1.0176  |                                       |
|                                                                | aug-cc-pV(T+d)Z | -69.1               | 1.9606                                 | 1.8029                              | 1.4793                              | 1.4793                              | 1.0156                              | 1.0156                                | 1.0177                                |                                       |
| $\text{H}_2\text{O}\cdots\text{CH}_3\text{PO}_2$               | aug-cc-pVTZ     | $\Delta E$<br>-35.0 | $d(\text{P}\cdots\text{O})$<br>2.1516  | $r_{1\text{C}-5\text{P}}$<br>1.7971 | $r_{5\text{P}-6\text{O}}$<br>1.4817 | $r_{5\text{P}-7\text{O}}$<br>1.4817 | $r_{8\text{O}-9\text{H}}$<br>0.9693 | $r_{8\text{O}-10\text{H}}$<br>0.9693  |                                       |                                       |
|                                                                | aug-cc-pV(T+d)Z | -34.3               | 2.1218                                 | 1.7922                              | 1.4737                              | 1.4737                              | 0.9695                              | 0.9695                                |                                       |                                       |
| $\text{HNC}\cdots\text{CH}_3\text{PO}_2$                       | aug-cc-pVTZ     | $\Delta E$<br>-24.1 | $d(\text{P}\cdots\text{C})$<br>2.1915  | $r_{1\text{C}-5\text{P}}$<br>1.7982 | $r_{5\text{P}-6\text{O}}$<br>1.4834 | $r_{5\text{P}-7\text{O}}$<br>1.4834 | $r_{8\text{H}-9\text{N}}$<br>1.0001 | $r_{9\text{N}-10\text{C}}$<br>1.1661  |                                       |                                       |
|                                                                | aug-cc-pV(T+d)Z | -22.8               | 2.1228                                 | 1.7936                              | 1.4763                              | 1.4763                              | 1.0003                              | 1.1650                                |                                       |                                       |
| $\text{HCCH}\cdots\text{CH}_3\text{PO}_2$                      | aug-cc-pVTZ     | $\Delta E$<br>-16.6 | $d(\text{P}\cdots\text{C8})$<br>2.9709 | $r_{1\text{C}-5\text{P}}$<br>1.8002 | $r_{5\text{P}-6\text{O}}$<br>1.4779 | $r_{5\text{P}-7\text{O}}$<br>1.4779 | $r_{8\text{C}-9\text{H}}$<br>1.0635 | $r_{8\text{C}-10\text{C}}$<br>1.2147  | $r_{10\text{C}-11\text{H}}$<br>1.0635 |                                       |
|                                                                | aug-cc-pV(T+d)Z | -16.4               | 2.9675                                 | 1.7951                              | 1.4693                              | 1.4693                              | 1.0635                              | 1.2148                                | 1.0635                                |                                       |
| $\text{H}_3\text{N}\cdots\textit{trans}\text{-CH}_3\text{OPO}$ | aug-cc-pVTZ     | $\Delta E$<br>-16.0 | $d(\text{P}\cdots\text{N})$<br>2.5097  | $r_{3\text{C}-2\text{O}}$<br>1.4322 | $r_{2\text{O}-1\text{P}}$<br>1.6442 | $r_{1\text{P}-7\text{O}}$<br>1.4902 | $r_{8\text{N}-9\text{H}}$<br>1.0137 | $r_{8\text{N}-10\text{H1}}$<br>1.0149 | $r_{8\text{N}-11\text{H}}$<br>1.0137  |                                       |

|                                                             |                 |            |                             |                           |                           |                           |                           |                             |                            |
|-------------------------------------------------------------|-----------------|------------|-----------------------------|---------------------------|---------------------------|---------------------------|---------------------------|-----------------------------|----------------------------|
|                                                             | aug-cc-pV(T+d)Z | -16.0      | 2.5130                      | 1.4328                    | 1.6338                    | 1.4824                    | 1.0137                    | 1.0149                      | 1.0136                     |
|                                                             |                 | $\Delta E$ | $d(\text{P}\cdots\text{O})$ | $r_{3\text{C}-2\text{O}}$ | $r_{2\text{O}-1\text{P}}$ | $r_{1\text{P}-7\text{O}}$ | $r_{8\text{O}-9\text{H}}$ | $r_{8\text{O}-10\text{H}}$  |                            |
| H <sub>2</sub> O $\cdots$ <i>trans</i> -CH <sub>3</sub> OPO | aug-cc-pVTZ     | -14.1      | 2.8906                      | 1.4398                    | 1.6253                    | 1.4886                    | 0.9627                    | 0.9651                      |                            |
|                                                             | aug-cc-pV(T+d)Z | -14.1      | 2.8916                      | 1.4402                    | 1.6158                    | 1.4804                    | 0.9627                    | 0.9650                      |                            |
|                                                             |                 | $\Delta E$ | $d(\text{P}\cdots\text{N})$ | $r_{3\text{C}-2\text{O}}$ | $r_{2\text{O}-1\text{P}}$ | $r_{1\text{P}-7\text{O}}$ | $r_{8\text{N}-9\text{H}}$ | $r_{8\text{N}-10\text{H}1}$ | $r_{8\text{N}-11\text{H}}$ |
| H <sub>3</sub> N $\cdots$ <i>cis</i> -CH <sub>3</sub> OPO   | aug-cc-pVTZ     | -12.9      | 2.5190                      | 1.4361                    | 1.6335                    | 1.4976                    | 1.0143                    | 1.0133                      | 1.0133                     |
|                                                             | aug-cc-pV(T+d)Z | -12.9      | 2.5271                      | 1.4365                    | 1.6228                    | 1.4896                    | 1.0143                    | 1.0133                      | 1.0133                     |

<sup>a</sup> $\Delta E$  Binding energies calculated at the CCSD(T)/aug-cc-pV(T+d)Z level basing on the MP2/aug-cc-pVTZ and MP2/aug-cc-pV(T+d)Z optimized geometries.

**Table S2** Binding energies (kJ·mol<sup>-1</sup>), main geometrical parameters (Å) calculated at the MP2 level for the hydrogen-bonded complexes<sup>a</sup>

| Complexes                                            | Basis set       | $\Delta E$          | $d(\text{O}\cdots\text{H})$           | $r_{1\text{C}-5\text{O}}$           | $r_{5\text{O}-6\text{P}}$           | $r_{6\text{P}-7\text{O}}$           | $r_{6\text{P}-8\text{O}}$            | $r_{9\text{O}-10\text{N}}$            | $r_{10\text{N}-11\text{C}}$           |                                      |
|------------------------------------------------------|-----------------|---------------------|---------------------------------------|-------------------------------------|-------------------------------------|-------------------------------------|--------------------------------------|---------------------------------------|---------------------------------------|--------------------------------------|
| CH <sub>3</sub> OPO <sub>2</sub> ···HNC              | aug-cc-pVTZ     | -25.3               | 1.8190                                | 1.4569                              | 1.5712                              | 1.4725                              | 1.4752                               | 1.0127                                | 1.1764                                |                                      |
|                                                      | aug-cc-pV(T+d)Z | -25.2               | 1.8194                                | 1.4572                              | 1.5629                              | 1.4642                              | 1.4672                               | 1.0127                                | 1.1764                                |                                      |
| CH <sub>3</sub> OPO <sub>2</sub> ···HCCH             | aug-cc-pVTZ     | $\Delta E$<br>-9.0  | $d(\text{O}\cdots\text{H})$<br>2.2375 | $r_{1\text{C}-5\text{O}}$<br>1.4528 | $r_{5\text{O}-6\text{P}}$<br>1.5761 | $r_{6\text{P}-7\text{O}}$<br>1.4752 | $r_{6\text{P}-8\text{O}}$<br>1.4725  | $r_{12\text{H}-11\text{C}}$<br>1.0658 | $r_{11\text{C}-9\text{C}}$<br>1.2135  | $r_{9\text{C}-10\text{H}}$<br>1.0620 |
|                                                      | aug-cc-pV(T+d)Z | -8.9                | 2.2383                                | 1.4526                              | 1.5675                              | 1.4670                              | 1.4645                               | 1.0658                                | 1.2135                                | 1.0620                               |
| CH <sub>3</sub> PO <sub>2</sub> ···H <sub>2</sub> O  | aug-cc-pVTZ     | $\Delta E$<br>-21.0 | $d(\text{O}\cdots\text{H})$<br>1.9676 | $r_{1\text{C}-5\text{P}}$<br>1.7973 | $r_{5\text{P}-6\text{O}}$<br>1.4823 | $r_{5\text{P}-7\text{O}}$<br>1.4763 | $r_{9\text{H}-8\text{O}}$<br>0.9691  | $r_{8\text{O}-10\text{H}}$<br>0.9607  |                                       |                                      |
|                                                      | aug-cc-pV(T+d)Z | -20.9               | 1.9762                                | 1.7918                              | 1.4736                              | 1.4677                              | 0.9688                               | 0.9607                                |                                       |                                      |
| CH <sub>3</sub> PO <sub>2</sub> ···HNC               | aug-cc-pVTZ     | $\Delta E$<br>-27.1 | $d(\text{O}\cdots\text{H})$<br>1.7941 | $r_{1\text{C}-5\text{P}}$<br>1.7974 | $r_{5\text{P}-6\text{O}}$<br>1.4843 | $r_{5\text{P}-7\text{O}}$<br>1.4736 | $r_{8\text{H}-9\text{N}}$<br>1.0167  | $r_{9\text{N}-10\text{C}}$<br>1.1771  |                                       |                                      |
|                                                      | aug-cc-pV(T+d)Z | -27.1               | 1.7985                                | 1.7920                              | 1.4755                              | 1.4651                              | 1.0162                               | 1.1771                                |                                       |                                      |
| CH <sub>3</sub> PO <sub>2</sub> ···HCCH              | aug-cc-pVTZ     | $\Delta E$<br>-12.7 | $d(\text{O}\cdots\text{H})$<br>2.2732 | $r_{1\text{C}-5\text{P}}$<br>1.7994 | $r_{5\text{P}-6\text{O}}$<br>1.4770 | $r_{5\text{P}-7\text{O}}$<br>1.4800 | $r_{9\text{H}-8\text{C}}$<br>1.0665  | $r_{8\text{C}-10\text{C}}$<br>1.2139  | $r_{10\text{C}-11\text{H}}$<br>1.0623 |                                      |
|                                                      | aug-cc-pV(T+d)Z | -12.6               | 2.2753                                | 1.7940                              | 1.4683                              | 1.4713                              | 1.0664                               | 1.2139                                | 1.0623                                |                                      |
| <i>trans</i> -CH <sub>3</sub> OPO···H <sub>2</sub> O | aug-cc-pVTZ     | $\Delta E$<br>-14.7 | $d(\text{O}\cdots\text{H})$<br>1.9712 | $r_{2\text{O}-3\text{C}}$<br>1.4426 | $r_{1\text{P}-2\text{O}}$<br>1.6171 | $r_{1\text{P}-7\text{O}}$<br>1.4890 | $r_{9\text{H}-8\text{O}}$<br>0.9683  | $r_{8\text{O}-10\text{H}}$<br>0.9605  |                                       |                                      |
|                                                      | aug-cc-pV(T+d)Z | -14.7               | 1.9713                                | 1.4432                              | 1.6071                              | 1.4809                              | 0.9683                               | 0.9605                                |                                       |                                      |
| <i>trans</i> -CH <sub>3</sub> OPO···HNC              | aug-cc-pVTZ     | $\Delta E$<br>-31.5 | $d(\text{O}\cdots\text{H})$<br>1.7893 | $r_{2\text{O}-3\text{C}}$<br>1.4457 | $r_{1\text{P}-2\text{O}}$<br>1.6133 | $r_{1\text{P}-7\text{O}}$<br>1.4906 | $r_{8\text{H}-9\text{N}}$<br>1.0161  | $r_{9\text{N}-10\text{C}}$<br>1.1763  |                                       |                                      |
|                                                      | aug-cc-pV(T+d)Z | -31.5               | 1.7886                                | 1.4462                              | 1.6036                              | 1.4824                              | 1.0159                               | 1.1763                                |                                       |                                      |
| <i>trans</i> -CH <sub>3</sub> OPO···HCCH             | aug-cc-pVTZ     | $\Delta E$<br>-10.5 | $d(\text{O}\cdots\text{H})$<br>2.1684 | $r_{2\text{O}-3\text{C}}$<br>1.4421 | $r_{1\text{P}-2\text{O}}$<br>1.6219 | $r_{1\text{P}-7\text{O}}$<br>1.4870 | $r_{9\text{H}-8\text{C}}$<br>1.0671  | $r_{8\text{C}-10\text{C}}$<br>1.2136  | $r_{10\text{C}-11\text{H}}$<br>1.0619 |                                      |
|                                                      | aug-cc-pV(T+d)Z | -10.5               | 2.1690                                | 1.4427                              | 1.6119                              | 1.4790                              | 1.0672                               | 1.2136                                | 1.0619                                |                                      |
| <i>cis</i> -CH <sub>3</sub> OPO···NH <sub>3</sub>    | aug-cc-pVTZ     | $\Delta E$<br>-5.7  | $d(\text{O}\cdots\text{H})$<br>2.2080 | $r_{2\text{O}-3\text{C}}$<br>1.4466 | $r_{1\text{P}-2\text{O}}$<br>1.6148 | $r_{1\text{P}-7\text{O}}$<br>1.4940 | $r_{10\text{H}-8\text{N}}$<br>1.0146 | $r_{8\text{N}-9\text{H}}$<br>1.0117   | $r_{8\text{N}-11\text{H}}$<br>1.0117  |                                      |

|                                                    |                 |            |                             |                           |                           |                           |                            |                            |                             |
|----------------------------------------------------|-----------------|------------|-----------------------------|---------------------------|---------------------------|---------------------------|----------------------------|----------------------------|-----------------------------|
|                                                    | aug-cc-pV(T+d)Z | -5.7       | 2.2080                      | 1.4473                    | 1.6049                    | 1.4856                    | 1.0146                     | 1.0117                     | 1.0117                      |
| <i>cis</i> -CH <sub>3</sub> OPO···H <sub>2</sub> O |                 | $\Delta E$ | $d(\text{O}\cdots\text{H})$ | $r_{2\text{O}-3\text{C}}$ | $r_{1\text{P}-2\text{O}}$ | $r_{1\text{P}-7\text{O}}$ | $r_{10\text{H}-8\text{N}}$ | $r_{8\text{N}-9\text{H}}$  |                             |
|                                                    | aug-cc-pVTZ     | -19.9      | 1.9161                      | 1.4545                    | 1.6054                    | 1.4971                    | 0.9703                     | 0.9607                     |                             |
|                                                    | aug-cc-pV(T+d)Z | -19.9      | 1.9148                      | 1.4552                    | 1.5956                    | 1.4890                    | 0.9703                     | 0.9606                     |                             |
| <i>cis</i> -CH <sub>3</sub> OPO···HNC              |                 | $\Delta E$ | $d(\text{O}\cdots\text{H})$ | $r_{2\text{O}-3\text{C}}$ | $r_{1\text{P}-2\text{O}}$ | $r_{1\text{P}-7\text{O}}$ | $r_{8\text{H}-9\text{N}}$  | $r_{9\text{N}-10\text{C}}$ |                             |
|                                                    | aug-cc-pVTZ     | -32.0      | 1.7531                      | 1.4532                    | 1.6027                    | 1.4993                    | 1.0194                     | 1.1769                     |                             |
|                                                    | aug-cc-pV(T+d)Z | -32.1      | 1.7534                      | 1.4539                    | 1.5930                    | 1.4911                    | 1.0194                     | 1.1769                     |                             |
| <i>cis</i> -CH <sub>3</sub> OPO···HCCH             |                 | $\Delta E$ | $d(\text{O}\cdots\text{H})$ | $r_{2\text{O}-3\text{C}}$ | $r_{1\text{P}-2\text{O}}$ | $r_{1\text{P}-7\text{O}}$ | $r_{9\text{H}-8\text{C}}$  | $r_{8\text{C}-10\text{C}}$ | $r_{10\text{C}-11\text{H}}$ |
|                                                    | aug-cc-pVTZ     | -12.7      | 2.1526                      | 1.4505                    | 1.6111                    | 1.4955                    | 1.0679                     | 1.2140                     | 1.0621                      |
|                                                    | aug-cc-pV(T+d)Z | -12.8      | 2.1525                      | 1.4512                    | 1.6012                    | 1.4874                    | 1.0680                     | 1.2140                     | 1.0622                      |

<sup>a</sup> $\Delta E$  Binding energies calculated at the CCSD(T)/aug-cc-pV(T+d)Z level basing on the MP2/aug-cc-pVTZ and MP2/aug-cc-pV(T+d)Z optimized geometries.

Table S3. Equilibrium geometries (Å) and zero point vibrational energies (a.u.) at the MP2/aug-cc-pV(T+d)Z level, total energies (a.u.) at the CCSD(T)/aug-cc-pV(T+d)Z//MP2/aug-cc-pV(T+d)Z level for the pnictogen- and hydrogen-bonded complexes

|     |                                                                                                                                                                                                                                                                                                                                                                                                                                                                                                                                                                                                                                                                                                                                                                                                                                                                                                                                                                                                                                                                             |          |          |          |          |    |          |          |         |    |          |          |          |    |          |          |          |    |          |          |          |    |         |          |         |    |         |          |         |    |          |          |          |    |          |          |          |     |          |          |          |     |          |          |          |     |         |         |         |
|-----|-----------------------------------------------------------------------------------------------------------------------------------------------------------------------------------------------------------------------------------------------------------------------------------------------------------------------------------------------------------------------------------------------------------------------------------------------------------------------------------------------------------------------------------------------------------------------------------------------------------------------------------------------------------------------------------------------------------------------------------------------------------------------------------------------------------------------------------------------------------------------------------------------------------------------------------------------------------------------------------------------------------------------------------------------------------------------------|----------|----------|----------|----------|----|----------|----------|---------|----|----------|----------|----------|----|----------|----------|----------|----|----------|----------|----------|----|---------|----------|---------|----|---------|----------|---------|----|----------|----------|----------|----|----------|----------|----------|-----|----------|----------|----------|-----|----------|----------|----------|-----|---------|---------|---------|
|     | <p>H<sub>3</sub>N...CH<sub>3</sub>OPO<sub>2</sub><br/> <math>E_{\text{CCSD(T)}} = -662.748457</math> <math>E_{\text{ZPVE}} = 0.092313</math></p> <table border="1"> <tbody> <tr><td>1C</td><td>-2.18601</td><td>0.14138</td><td>-0.08963</td></tr> <tr><td>2H</td><td>-2.30107</td><td>-0.54275</td><td>0.74567</td></tr> <tr><td>3H</td><td>-2.97997</td><td>0.00006</td><td>-0.81594</td></tr> <tr><td>4H</td><td>-2.21253</td><td>1.16629</td><td>0.28257</td></tr> <tr><td>5O</td><td>-0.95424</td><td>-0.11224</td><td>-0.78595</td></tr> <tr><td>6P</td><td>0.38452</td><td>-0.33674</td><td>0.06608</td></tr> <tr><td>7O</td><td>0.11818</td><td>-0.4598</td><td>1.51293</td></tr> <tr><td>8O</td><td>1.42548</td><td>-0.96171</td><td>-0.76362</td></tr> <tr><td>9N</td><td>0.97377</td><td>1.49025</td><td>-0.03305</td></tr> <tr><td>10H</td><td>0.35005</td><td>2.12695</td><td>0.45369</td></tr> <tr><td>11H</td><td>1.07225</td><td>1.76668</td><td>-1.00578</td></tr> <tr><td>12H</td><td>1.88772</td><td>1.52373</td><td>0.41088</td></tr> </tbody> </table> | 1C       | -2.18601 | 0.14138  | -0.08963 | 2H | -2.30107 | -0.54275 | 0.74567 | 3H | -2.97997 | 0.00006  | -0.81594 | 4H | -2.21253 | 1.16629  | 0.28257  | 5O | -0.95424 | -0.11224 | -0.78595 | 6P | 0.38452 | -0.33674 | 0.06608 | 7O | 0.11818 | -0.4598  | 1.51293 | 8O | 1.42548  | -0.96171 | -0.76362 | 9N | 0.97377  | 1.49025  | -0.03305 | 10H | 0.35005  | 2.12695  | 0.45369  | 11H | 1.07225  | 1.76668  | -1.00578 | 12H | 1.88772 | 1.52373 | 0.41088 |
| 1C  | -2.18601                                                                                                                                                                                                                                                                                                                                                                                                                                                                                                                                                                                                                                                                                                                                                                                                                                                                                                                                                                                                                                                                    | 0.14138  | -0.08963 |          |          |    |          |          |         |    |          |          |          |    |          |          |          |    |          |          |          |    |         |          |         |    |         |          |         |    |          |          |          |    |          |          |          |     |          |          |          |     |          |          |          |     |         |         |         |
| 2H  | -2.30107                                                                                                                                                                                                                                                                                                                                                                                                                                                                                                                                                                                                                                                                                                                                                                                                                                                                                                                                                                                                                                                                    | -0.54275 | 0.74567  |          |          |    |          |          |         |    |          |          |          |    |          |          |          |    |          |          |          |    |         |          |         |    |         |          |         |    |          |          |          |    |          |          |          |     |          |          |          |     |          |          |          |     |         |         |         |
| 3H  | -2.97997                                                                                                                                                                                                                                                                                                                                                                                                                                                                                                                                                                                                                                                                                                                                                                                                                                                                                                                                                                                                                                                                    | 0.00006  | -0.81594 |          |          |    |          |          |         |    |          |          |          |    |          |          |          |    |          |          |          |    |         |          |         |    |         |          |         |    |          |          |          |    |          |          |          |     |          |          |          |     |          |          |          |     |         |         |         |
| 4H  | -2.21253                                                                                                                                                                                                                                                                                                                                                                                                                                                                                                                                                                                                                                                                                                                                                                                                                                                                                                                                                                                                                                                                    | 1.16629  | 0.28257  |          |          |    |          |          |         |    |          |          |          |    |          |          |          |    |          |          |          |    |         |          |         |    |         |          |         |    |          |          |          |    |          |          |          |     |          |          |          |     |          |          |          |     |         |         |         |
| 5O  | -0.95424                                                                                                                                                                                                                                                                                                                                                                                                                                                                                                                                                                                                                                                                                                                                                                                                                                                                                                                                                                                                                                                                    | -0.11224 | -0.78595 |          |          |    |          |          |         |    |          |          |          |    |          |          |          |    |          |          |          |    |         |          |         |    |         |          |         |    |          |          |          |    |          |          |          |     |          |          |          |     |          |          |          |     |         |         |         |
| 6P  | 0.38452                                                                                                                                                                                                                                                                                                                                                                                                                                                                                                                                                                                                                                                                                                                                                                                                                                                                                                                                                                                                                                                                     | -0.33674 | 0.06608  |          |          |    |          |          |         |    |          |          |          |    |          |          |          |    |          |          |          |    |         |          |         |    |         |          |         |    |          |          |          |    |          |          |          |     |          |          |          |     |          |          |          |     |         |         |         |
| 7O  | 0.11818                                                                                                                                                                                                                                                                                                                                                                                                                                                                                                                                                                                                                                                                                                                                                                                                                                                                                                                                                                                                                                                                     | -0.4598  | 1.51293  |          |          |    |          |          |         |    |          |          |          |    |          |          |          |    |          |          |          |    |         |          |         |    |         |          |         |    |          |          |          |    |          |          |          |     |          |          |          |     |          |          |          |     |         |         |         |
| 8O  | 1.42548                                                                                                                                                                                                                                                                                                                                                                                                                                                                                                                                                                                                                                                                                                                                                                                                                                                                                                                                                                                                                                                                     | -0.96171 | -0.76362 |          |          |    |          |          |         |    |          |          |          |    |          |          |          |    |          |          |          |    |         |          |         |    |         |          |         |    |          |          |          |    |          |          |          |     |          |          |          |     |          |          |          |     |         |         |         |
| 9N  | 0.97377                                                                                                                                                                                                                                                                                                                                                                                                                                                                                                                                                                                                                                                                                                                                                                                                                                                                                                                                                                                                                                                                     | 1.49025  | -0.03305 |          |          |    |          |          |         |    |          |          |          |    |          |          |          |    |          |          |          |    |         |          |         |    |         |          |         |    |          |          |          |    |          |          |          |     |          |          |          |     |          |          |          |     |         |         |         |
| 10H | 0.35005                                                                                                                                                                                                                                                                                                                                                                                                                                                                                                                                                                                                                                                                                                                                                                                                                                                                                                                                                                                                                                                                     | 2.12695  | 0.45369  |          |          |    |          |          |         |    |          |          |          |    |          |          |          |    |          |          |          |    |         |          |         |    |         |          |         |    |          |          |          |    |          |          |          |     |          |          |          |     |          |          |          |     |         |         |         |
| 11H | 1.07225                                                                                                                                                                                                                                                                                                                                                                                                                                                                                                                                                                                                                                                                                                                                                                                                                                                                                                                                                                                                                                                                     | 1.76668  | -1.00578 |          |          |    |          |          |         |    |          |          |          |    |          |          |          |    |          |          |          |    |         |          |         |    |         |          |         |    |          |          |          |    |          |          |          |     |          |          |          |     |          |          |          |     |         |         |         |
| 12H | 1.88772                                                                                                                                                                                                                                                                                                                                                                                                                                                                                                                                                                                                                                                                                                                                                                                                                                                                                                                                                                                                                                                                     | 1.52373  | 0.41088  |          |          |    |          |          |         |    |          |          |          |    |          |          |          |    |          |          |          |    |         |          |         |    |         |          |         |    |          |          |          |    |          |          |          |     |          |          |          |     |          |          |          |     |         |         |         |
|     | <p>H<sub>2</sub>O...CH<sub>3</sub>OPO<sub>2</sub><br/> <math>E_{\text{CCSD(T)}} = -682.590648</math> <math>E_{\text{ZPVE}} = 0.077925</math></p> <table border="1"> <tbody> <tr><td>1C</td><td>-2.16672</td><td>0.17475</td><td>-0.10919</td></tr> <tr><td>2H</td><td>-2.28266</td><td>-0.21219</td><td>0.89875</td></tr> <tr><td>3H</td><td>-2.98965</td><td>-0.13968</td><td>-0.74149</td></tr> <tr><td>4H</td><td>-2.10824</td><td>1.26106</td><td>-0.08613</td></tr> <tr><td>5O</td><td>-0.97383</td><td>-0.35889</td><td>-0.7187</td></tr> <tr><td>6P</td><td>0.36914</td><td>-0.38012</td><td>0.10999</td></tr> <tr><td>7O</td><td>0.18893</td><td>-0.20449</td><td>1.56074</td></tr> <tr><td>8O</td><td>1.46691</td><td>-0.97429</td><td>-0.66074</td></tr> <tr><td>9O</td><td>0.83006</td><td>1.57836</td><td>-0.28157</td></tr> <tr><td>10H</td><td>1.12928</td><td>1.90832</td><td>0.57961</td></tr> <tr><td>11H</td><td>1.61797</td><td>1.5104</td><td>-0.84324</td></tr> </tbody> </table>                                                                      | 1C       | -2.16672 | 0.17475  | -0.10919 | 2H | -2.28266 | -0.21219 | 0.89875 | 3H | -2.98965 | -0.13968 | -0.74149 | 4H | -2.10824 | 1.26106  | -0.08613 | 5O | -0.97383 | -0.35889 | -0.7187  | 6P | 0.36914 | -0.38012 | 0.10999 | 7O | 0.18893 | -0.20449 | 1.56074 | 8O | 1.46691  | -0.97429 | -0.66074 | 9O | 0.83006  | 1.57836  | -0.28157 | 10H | 1.12928  | 1.90832  | 0.57961  | 11H | 1.61797  | 1.5104   | -0.84324 |     |         |         |         |
| 1C  | -2.16672                                                                                                                                                                                                                                                                                                                                                                                                                                                                                                                                                                                                                                                                                                                                                                                                                                                                                                                                                                                                                                                                    | 0.17475  | -0.10919 |          |          |    |          |          |         |    |          |          |          |    |          |          |          |    |          |          |          |    |         |          |         |    |         |          |         |    |          |          |          |    |          |          |          |     |          |          |          |     |          |          |          |     |         |         |         |
| 2H  | -2.28266                                                                                                                                                                                                                                                                                                                                                                                                                                                                                                                                                                                                                                                                                                                                                                                                                                                                                                                                                                                                                                                                    | -0.21219 | 0.89875  |          |          |    |          |          |         |    |          |          |          |    |          |          |          |    |          |          |          |    |         |          |         |    |         |          |         |    |          |          |          |    |          |          |          |     |          |          |          |     |          |          |          |     |         |         |         |
| 3H  | -2.98965                                                                                                                                                                                                                                                                                                                                                                                                                                                                                                                                                                                                                                                                                                                                                                                                                                                                                                                                                                                                                                                                    | -0.13968 | -0.74149 |          |          |    |          |          |         |    |          |          |          |    |          |          |          |    |          |          |          |    |         |          |         |    |         |          |         |    |          |          |          |    |          |          |          |     |          |          |          |     |          |          |          |     |         |         |         |
| 4H  | -2.10824                                                                                                                                                                                                                                                                                                                                                                                                                                                                                                                                                                                                                                                                                                                                                                                                                                                                                                                                                                                                                                                                    | 1.26106  | -0.08613 |          |          |    |          |          |         |    |          |          |          |    |          |          |          |    |          |          |          |    |         |          |         |    |         |          |         |    |          |          |          |    |          |          |          |     |          |          |          |     |          |          |          |     |         |         |         |
| 5O  | -0.97383                                                                                                                                                                                                                                                                                                                                                                                                                                                                                                                                                                                                                                                                                                                                                                                                                                                                                                                                                                                                                                                                    | -0.35889 | -0.7187  |          |          |    |          |          |         |    |          |          |          |    |          |          |          |    |          |          |          |    |         |          |         |    |         |          |         |    |          |          |          |    |          |          |          |     |          |          |          |     |          |          |          |     |         |         |         |
| 6P  | 0.36914                                                                                                                                                                                                                                                                                                                                                                                                                                                                                                                                                                                                                                                                                                                                                                                                                                                                                                                                                                                                                                                                     | -0.38012 | 0.10999  |          |          |    |          |          |         |    |          |          |          |    |          |          |          |    |          |          |          |    |         |          |         |    |         |          |         |    |          |          |          |    |          |          |          |     |          |          |          |     |          |          |          |     |         |         |         |
| 7O  | 0.18893                                                                                                                                                                                                                                                                                                                                                                                                                                                                                                                                                                                                                                                                                                                                                                                                                                                                                                                                                                                                                                                                     | -0.20449 | 1.56074  |          |          |    |          |          |         |    |          |          |          |    |          |          |          |    |          |          |          |    |         |          |         |    |         |          |         |    |          |          |          |    |          |          |          |     |          |          |          |     |          |          |          |     |         |         |         |
| 8O  | 1.46691                                                                                                                                                                                                                                                                                                                                                                                                                                                                                                                                                                                                                                                                                                                                                                                                                                                                                                                                                                                                                                                                     | -0.97429 | -0.66074 |          |          |    |          |          |         |    |          |          |          |    |          |          |          |    |          |          |          |    |         |          |         |    |         |          |         |    |          |          |          |    |          |          |          |     |          |          |          |     |          |          |          |     |         |         |         |
| 9O  | 0.83006                                                                                                                                                                                                                                                                                                                                                                                                                                                                                                                                                                                                                                                                                                                                                                                                                                                                                                                                                                                                                                                                     | 1.57836  | -0.28157 |          |          |    |          |          |         |    |          |          |          |    |          |          |          |    |          |          |          |    |         |          |         |    |         |          |         |    |          |          |          |    |          |          |          |     |          |          |          |     |          |          |          |     |         |         |         |
| 10H | 1.12928                                                                                                                                                                                                                                                                                                                                                                                                                                                                                                                                                                                                                                                                                                                                                                                                                                                                                                                                                                                                                                                                     | 1.90832  | 0.57961  |          |          |    |          |          |         |    |          |          |          |    |          |          |          |    |          |          |          |    |         |          |         |    |         |          |         |    |          |          |          |    |          |          |          |     |          |          |          |     |          |          |          |     |         |         |         |
| 11H | 1.61797                                                                                                                                                                                                                                                                                                                                                                                                                                                                                                                                                                                                                                                                                                                                                                                                                                                                                                                                                                                                                                                                     | 1.5104   | -0.84324 |          |          |    |          |          |         |    |          |          |          |    |          |          |          |    |          |          |          |    |         |          |         |    |         |          |         |    |          |          |          |    |          |          |          |     |          |          |          |     |          |          |          |     |         |         |         |
|     | <p>HNC...CH<sub>3</sub>OPO<sub>2</sub><br/> <math>E_{\text{CCSD(T)}} = -699.504018</math> <math>E_{\text{ZPVE}} = 0.070260</math></p> <table border="1"> <tbody> <tr><td>1C</td><td>1.86521</td><td>-1.34633</td><td>-0.09201</td></tr> <tr><td>2H</td><td>2.3935</td><td>-0.92033</td><td>0.75575</td></tr> <tr><td>3H</td><td>2.56189</td><td>-1.75855</td><td>-0.81451</td></tr> <tr><td>4H</td><td>1.19246</td><td>-2.1288</td><td>0.25904</td></tr> <tr><td>5O</td><td>1.12582</td><td>-0.32804</td><td>-0.79036</td></tr> <tr><td>6P</td><td>0.16856</td><td>0.63097</td><td>0.06145</td></tr> <tr><td>7O</td><td>0.44286</td><td>0.57822</td><td>1.5171</td></tr> <tr><td>8O</td><td>-0.36437</td><td>1.72323</td><td>-0.77864</td></tr> <tr><td>9H</td><td>-3.39677</td><td>-1.49442</td><td>-0.01036</td></tr> <tr><td>10N</td><td>-2.48837</td><td>-1.07513</td><td>-0.00997</td></tr> <tr><td>11C</td><td>-1.44778</td><td>-0.55765</td><td>-0.01244</td></tr> </tbody> </table>                                                                                 | 1C       | 1.86521  | -1.34633 | -0.09201 | 2H | 2.3935   | -0.92033 | 0.75575 | 3H | 2.56189  | -1.75855 | -0.81451 | 4H | 1.19246  | -2.1288  | 0.25904  | 5O | 1.12582  | -0.32804 | -0.79036 | 6P | 0.16856 | 0.63097  | 0.06145 | 7O | 0.44286 | 0.57822  | 1.5171  | 8O | -0.36437 | 1.72323  | -0.77864 | 9H | -3.39677 | -1.49442 | -0.01036 | 10N | -2.48837 | -1.07513 | -0.00997 | 11C | -1.44778 | -0.55765 | -0.01244 |     |         |         |         |
| 1C  | 1.86521                                                                                                                                                                                                                                                                                                                                                                                                                                                                                                                                                                                                                                                                                                                                                                                                                                                                                                                                                                                                                                                                     | -1.34633 | -0.09201 |          |          |    |          |          |         |    |          |          |          |    |          |          |          |    |          |          |          |    |         |          |         |    |         |          |         |    |          |          |          |    |          |          |          |     |          |          |          |     |          |          |          |     |         |         |         |
| 2H  | 2.3935                                                                                                                                                                                                                                                                                                                                                                                                                                                                                                                                                                                                                                                                                                                                                                                                                                                                                                                                                                                                                                                                      | -0.92033 | 0.75575  |          |          |    |          |          |         |    |          |          |          |    |          |          |          |    |          |          |          |    |         |          |         |    |         |          |         |    |          |          |          |    |          |          |          |     |          |          |          |     |          |          |          |     |         |         |         |
| 3H  | 2.56189                                                                                                                                                                                                                                                                                                                                                                                                                                                                                                                                                                                                                                                                                                                                                                                                                                                                                                                                                                                                                                                                     | -1.75855 | -0.81451 |          |          |    |          |          |         |    |          |          |          |    |          |          |          |    |          |          |          |    |         |          |         |    |         |          |         |    |          |          |          |    |          |          |          |     |          |          |          |     |          |          |          |     |         |         |         |
| 4H  | 1.19246                                                                                                                                                                                                                                                                                                                                                                                                                                                                                                                                                                                                                                                                                                                                                                                                                                                                                                                                                                                                                                                                     | -2.1288  | 0.25904  |          |          |    |          |          |         |    |          |          |          |    |          |          |          |    |          |          |          |    |         |          |         |    |         |          |         |    |          |          |          |    |          |          |          |     |          |          |          |     |          |          |          |     |         |         |         |
| 5O  | 1.12582                                                                                                                                                                                                                                                                                                                                                                                                                                                                                                                                                                                                                                                                                                                                                                                                                                                                                                                                                                                                                                                                     | -0.32804 | -0.79036 |          |          |    |          |          |         |    |          |          |          |    |          |          |          |    |          |          |          |    |         |          |         |    |         |          |         |    |          |          |          |    |          |          |          |     |          |          |          |     |          |          |          |     |         |         |         |
| 6P  | 0.16856                                                                                                                                                                                                                                                                                                                                                                                                                                                                                                                                                                                                                                                                                                                                                                                                                                                                                                                                                                                                                                                                     | 0.63097  | 0.06145  |          |          |    |          |          |         |    |          |          |          |    |          |          |          |    |          |          |          |    |         |          |         |    |         |          |         |    |          |          |          |    |          |          |          |     |          |          |          |     |          |          |          |     |         |         |         |
| 7O  | 0.44286                                                                                                                                                                                                                                                                                                                                                                                                                                                                                                                                                                                                                                                                                                                                                                                                                                                                                                                                                                                                                                                                     | 0.57822  | 1.5171   |          |          |    |          |          |         |    |          |          |          |    |          |          |          |    |          |          |          |    |         |          |         |    |         |          |         |    |          |          |          |    |          |          |          |     |          |          |          |     |          |          |          |     |         |         |         |
| 8O  | -0.36437                                                                                                                                                                                                                                                                                                                                                                                                                                                                                                                                                                                                                                                                                                                                                                                                                                                                                                                                                                                                                                                                    | 1.72323  | -0.77864 |          |          |    |          |          |         |    |          |          |          |    |          |          |          |    |          |          |          |    |         |          |         |    |         |          |         |    |          |          |          |    |          |          |          |     |          |          |          |     |          |          |          |     |         |         |         |
| 9H  | -3.39677                                                                                                                                                                                                                                                                                                                                                                                                                                                                                                                                                                                                                                                                                                                                                                                                                                                                                                                                                                                                                                                                    | -1.49442 | -0.01036 |          |          |    |          |          |         |    |          |          |          |    |          |          |          |    |          |          |          |    |         |          |         |    |         |          |         |    |          |          |          |    |          |          |          |     |          |          |          |     |          |          |          |     |         |         |         |
| 10N | -2.48837                                                                                                                                                                                                                                                                                                                                                                                                                                                                                                                                                                                                                                                                                                                                                                                                                                                                                                                                                                                                                                                                    | -1.07513 | -0.00997 |          |          |    |          |          |         |    |          |          |          |    |          |          |          |    |          |          |          |    |         |          |         |    |         |          |         |    |          |          |          |    |          |          |          |     |          |          |          |     |          |          |          |     |         |         |         |
| 11C | -1.44778                                                                                                                                                                                                                                                                                                                                                                                                                                                                                                                                                                                                                                                                                                                                                                                                                                                                                                                                                                                                                                                                    | -0.55765 | -0.01244 |          |          |    |          |          |         |    |          |          |          |    |          |          |          |    |          |          |          |    |         |          |         |    |         |          |         |    |          |          |          |    |          |          |          |     |          |          |          |     |          |          |          |     |         |         |         |
|     | <p>HCCH...CH<sub>3</sub>OPO<sub>2</sub><br/> <math>E_{\text{CCSD(T)}} = -683.428446</math> <math>E_{\text{ZPVE}} = 0.079776</math></p> <table border="1"> <tbody> <tr><td>1C</td><td>1.62498</td><td>-1.45936</td><td>-0.19921</td></tr> <tr><td>2H</td><td>2.14819</td><td>-1.18429</td><td>0.71124</td></tr> <tr><td>3H</td><td>2.31113</td><td>-1.85773</td><td>-0.93797</td></tr> <tr><td>4H</td><td>0.84162</td><td>-2.18053</td><td>0.0207</td></tr> <tr><td>5O</td><td>1.03088</td><td>-0.29073</td><td>-0.81355</td></tr> <tr><td>6P</td><td>0.24856</td><td>0.74123</td><td>0.09724</td></tr> <tr><td>7O</td><td>0.41314</td><td>0.52643</td><td>1.54879</td></tr> <tr><td>8O</td><td>-0.37221</td><td>1.81378</td><td>-0.69397</td></tr> <tr><td>9C</td><td>-1.89269</td><td>-1.12182</td><td>0.55681</td></tr> <tr><td>10H</td><td>-1.78852</td><td>-1.3644</td><td>1.58718</td></tr> <tr><td>11C</td><td>-2.01381</td><td>-0.81696</td><td>-0.61355</td></tr> </tbody> </table>                                                                                 | 1C       | 1.62498  | -1.45936 | -0.19921 | 2H | 2.14819  | -1.18429 | 0.71124 | 3H | 2.31113  | -1.85773 | -0.93797 | 4H | 0.84162  | -2.18053 | 0.0207   | 5O | 1.03088  | -0.29073 | -0.81355 | 6P | 0.24856 | 0.74123  | 0.09724 | 7O | 0.41314 | 0.52643  | 1.54879 | 8O | -0.37221 | 1.81378  | -0.69397 | 9C | -1.89269 | -1.12182 | 0.55681  | 10H | -1.78852 | -1.3644  | 1.58718  | 11C | -2.01381 | -0.81696 | -0.61355 |     |         |         |         |
| 1C  | 1.62498                                                                                                                                                                                                                                                                                                                                                                                                                                                                                                                                                                                                                                                                                                                                                                                                                                                                                                                                                                                                                                                                     | -1.45936 | -0.19921 |          |          |    |          |          |         |    |          |          |          |    |          |          |          |    |          |          |          |    |         |          |         |    |         |          |         |    |          |          |          |    |          |          |          |     |          |          |          |     |          |          |          |     |         |         |         |
| 2H  | 2.14819                                                                                                                                                                                                                                                                                                                                                                                                                                                                                                                                                                                                                                                                                                                                                                                                                                                                                                                                                                                                                                                                     | -1.18429 | 0.71124  |          |          |    |          |          |         |    |          |          |          |    |          |          |          |    |          |          |          |    |         |          |         |    |         |          |         |    |          |          |          |    |          |          |          |     |          |          |          |     |          |          |          |     |         |         |         |
| 3H  | 2.31113                                                                                                                                                                                                                                                                                                                                                                                                                                                                                                                                                                                                                                                                                                                                                                                                                                                                                                                                                                                                                                                                     | -1.85773 | -0.93797 |          |          |    |          |          |         |    |          |          |          |    |          |          |          |    |          |          |          |    |         |          |         |    |         |          |         |    |          |          |          |    |          |          |          |     |          |          |          |     |          |          |          |     |         |         |         |
| 4H  | 0.84162                                                                                                                                                                                                                                                                                                                                                                                                                                                                                                                                                                                                                                                                                                                                                                                                                                                                                                                                                                                                                                                                     | -2.18053 | 0.0207   |          |          |    |          |          |         |    |          |          |          |    |          |          |          |    |          |          |          |    |         |          |         |    |         |          |         |    |          |          |          |    |          |          |          |     |          |          |          |     |          |          |          |     |         |         |         |
| 5O  | 1.03088                                                                                                                                                                                                                                                                                                                                                                                                                                                                                                                                                                                                                                                                                                                                                                                                                                                                                                                                                                                                                                                                     | -0.29073 | -0.81355 |          |          |    |          |          |         |    |          |          |          |    |          |          |          |    |          |          |          |    |         |          |         |    |         |          |         |    |          |          |          |    |          |          |          |     |          |          |          |     |          |          |          |     |         |         |         |
| 6P  | 0.24856                                                                                                                                                                                                                                                                                                                                                                                                                                                                                                                                                                                                                                                                                                                                                                                                                                                                                                                                                                                                                                                                     | 0.74123  | 0.09724  |          |          |    |          |          |         |    |          |          |          |    |          |          |          |    |          |          |          |    |         |          |         |    |         |          |         |    |          |          |          |    |          |          |          |     |          |          |          |     |          |          |          |     |         |         |         |
| 7O  | 0.41314                                                                                                                                                                                                                                                                                                                                                                                                                                                                                                                                                                                                                                                                                                                                                                                                                                                                                                                                                                                                                                                                     | 0.52643  | 1.54879  |          |          |    |          |          |         |    |          |          |          |    |          |          |          |    |          |          |          |    |         |          |         |    |         |          |         |    |          |          |          |    |          |          |          |     |          |          |          |     |          |          |          |     |         |         |         |
| 8O  | -0.37221                                                                                                                                                                                                                                                                                                                                                                                                                                                                                                                                                                                                                                                                                                                                                                                                                                                                                                                                                                                                                                                                    | 1.81378  | -0.69397 |          |          |    |          |          |         |    |          |          |          |    |          |          |          |    |          |          |          |    |         |          |         |    |         |          |         |    |          |          |          |    |          |          |          |     |          |          |          |     |          |          |          |     |         |         |         |
| 9C  | -1.89269                                                                                                                                                                                                                                                                                                                                                                                                                                                                                                                                                                                                                                                                                                                                                                                                                                                                                                                                                                                                                                                                    | -1.12182 | 0.55681  |          |          |    |          |          |         |    |          |          |          |    |          |          |          |    |          |          |          |    |         |          |         |    |         |          |         |    |          |          |          |    |          |          |          |     |          |          |          |     |          |          |          |     |         |         |         |
| 10H | -1.78852                                                                                                                                                                                                                                                                                                                                                                                                                                                                                                                                                                                                                                                                                                                                                                                                                                                                                                                                                                                                                                                                    | -1.3644  | 1.58718  |          |          |    |          |          |         |    |          |          |          |    |          |          |          |    |          |          |          |    |         |          |         |    |         |          |         |    |          |          |          |    |          |          |          |     |          |          |          |     |          |          |          |     |         |         |         |
| 11C | -2.01381                                                                                                                                                                                                                                                                                                                                                                                                                                                                                                                                                                                                                                                                                                                                                                                                                                                                                                                                                                                                                                                                    | -0.81696 | -0.61355 |          |          |    |          |          |         |    |          |          |          |    |          |          |          |    |          |          |          |    |         |          |         |    |         |          |         |    |          |          |          |    |          |          |          |     |          |          |          |     |          |          |          |     |         |         |         |

|  |                                                                                                                                                                                                                                                                                                                                                                                                                                                                                                                                                                                                                                                                     |
|--|---------------------------------------------------------------------------------------------------------------------------------------------------------------------------------------------------------------------------------------------------------------------------------------------------------------------------------------------------------------------------------------------------------------------------------------------------------------------------------------------------------------------------------------------------------------------------------------------------------------------------------------------------------------------|
|  | <p>12H -2.12621 -0.53867 -1.63422</p> <p><math>\text{H}_3\text{N}\cdots\text{CH}_3\text{PO}_2</math><br/> <math>E_{\text{CCSD(T)}} = -587.594301</math> <math>E_{\text{ZPVE}} = 0.086031</math></p> 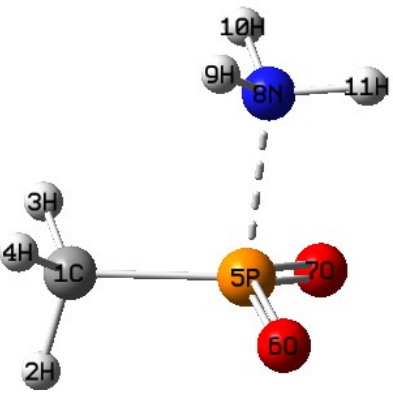 <p>1C 0.52602 1.64443 0.00000<br/> 2H 1.60015 1.82598 0.00000<br/> 3H 0.10225 2.08797 0.89868<br/> 4H 0.10225 2.08797 -0.89868<br/> 5P 0.29647 -0.14855 0.00000<br/> 6O 0.52602 -0.75012 -1.34111<br/> 7O 0.52602 -0.75012 1.34111<br/> 8N -1.68035 -0.14888 0.00000<br/> 9H -2.07641 0.27213 -0.8352<br/> 10H -2.07641 0.27213 0.8352<br/> 11H -1.90898 -1.14046 0.00000</p> |
|  | <p><math>\text{H}_2\text{O}\cdots\text{CH}_3\text{PO}_2</math><br/> <math>E_{\text{CCSD(T)}} = -607.441539</math> <math>E_{\text{ZPVE}} = 0.071569</math></p>  <p>1C 0.50117 1.65414 0.00000<br/> 2H 1.56405 1.89392 0.00000<br/> 3H 0.04433 2.0617 0.89693<br/> 4H 0.04433 2.0617 -0.89693<br/> 5P 0.35748 -0.13225 0.00000<br/> 6O 0.50117 -0.73955 -1.33504<br/> 7O 0.50117 -0.73955 1.33504<br/> 8O -1.76414 -0.10322 0.00000<br/> 9H -1.96384 -0.64994 -0.77531<br/> 10H -1.96384 -0.64994 0.77531</p>                                                                       |
|  | <p><math>\text{HNC}\cdots\text{CH}_3\text{PO}_2</math><br/> <math>E_{\text{CCSD(T)}} = -624.350376</math> <math>E_{\text{ZPVE}} = 0.063737</math></p>  <p>1C 0.83597 1.72767 0.00000<br/> 2H 1.90149 1.95669 0.00000<br/> 3H 0.38214 2.13732 0.89854<br/> 4H 0.38214 2.13732 -0.89854<br/> 5P 0.6627 -0.06218 0.00000<br/> 6O 0.83597 -0.67259 -1.34086<br/> 7O 0.83597 -0.67259 1.34086<br/> 8H -3.53253 -0.89954 0.00000<br/> 9N -2.61318 -0.50588 0.00000<br/> 10C -1.52879 -0.07707 0.00000</p>                                                                              |
|  | <p><math>\text{HCCH}\cdots\text{CH}_3\text{PO}_2</math><br/> <math>E_{\text{CCSD(T)}} = -608.281319</math> <math>E_{\text{ZPVE}} = 0.073431</math></p>  <p>1C 1.7584 -0.33917 0.00000<br/> 2H 2.3128 -1.27777 0.00000<br/> 3H 1.99538 0.22213 0.89833<br/> 4H 1.99538 0.22213 -0.89833<br/> 5P 0.00567 -0.74973 0.00000<br/> 6O -0.56332 -0.95559 -1.34831<br/> 7O -0.56332 -0.95559 1.34831<br/> 8C -0.56332 2.10227 0.60737<br/> 9H -0.58298 2.08832 1.67058<br/> 10C -0.56332 2.10227 -0.60737<br/> 11H -0.58298 2.08832 -1.67058</p>                                         |

|                                                                                     |                                                                                                                                                                                                                                                                                                                                                                                                                                                                                                                                                                                                                                                                                                                                                                                                                                                                                                                                                                                                                        |          |          |          |          |    |          |          |          |    |          |          |          |    |          |          |          |    |          |          |          |    |          |         |          |    |          |          |          |    |          |         |          |    |          |          |          |     |          |          |          |     |          |          |          |
|-------------------------------------------------------------------------------------|------------------------------------------------------------------------------------------------------------------------------------------------------------------------------------------------------------------------------------------------------------------------------------------------------------------------------------------------------------------------------------------------------------------------------------------------------------------------------------------------------------------------------------------------------------------------------------------------------------------------------------------------------------------------------------------------------------------------------------------------------------------------------------------------------------------------------------------------------------------------------------------------------------------------------------------------------------------------------------------------------------------------|----------|----------|----------|----------|----|----------|----------|----------|----|----------|----------|----------|----|----------|----------|----------|----|----------|----------|----------|----|----------|---------|----------|----|----------|----------|----------|----|----------|---------|----------|----|----------|----------|----------|-----|----------|----------|----------|-----|----------|----------|----------|
| 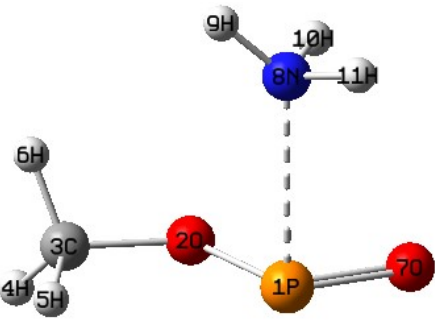   | <p><math>\text{H}_3\text{N}\cdots\text{trans-CH}_3\text{OPO}</math><br/> <math>E_{\text{CCSD(T)}} = -587.549403</math> <math>E_{\text{ZPVE}} = 0.083591</math></p> <table border="1"> <tbody> <tr><td>1P</td><td>0.28799</td><td>-0.61874</td><td>0.45685</td></tr> <tr><td>2O</td><td>-0.96855</td><td>-0.28797</td><td>-0.53356</td></tr> <tr><td>3C</td><td>-2.10692</td><td>0.35206</td><td>0.05583</td></tr> <tr><td>4H</td><td>-2.99768</td><td>-0.17845</td><td>-0.26858</td></tr> <tr><td>5H</td><td>-2.05386</td><td>0.33654</td><td>1.14647</td></tr> <tr><td>6H</td><td>-2.15092</td><td>1.38435</td><td>-0.28642</td></tr> <tr><td>7O</td><td>1.36873</td><td>-1.21248</td><td>-0.36602</td></tr> <tr><td>8N</td><td>1.16897</td><td>1.68815</td><td>-0.00916</td></tr> <tr><td>9H</td><td>0.79672</td><td>2.61874</td><td>0.1422</td></tr> <tr><td>10H</td><td>1.22601</td><td>1.52627</td><td>-1.00938</td></tr> <tr><td>11H</td><td>2.11707</td><td>1.66793</td><td>0.34879</td></tr> </tbody> </table> | 1P       | 0.28799  | -0.61874 | 0.45685  | 2O | -0.96855 | -0.28797 | -0.53356 | 3C | -2.10692 | 0.35206  | 0.05583  | 4H | -2.99768 | -0.17845 | -0.26858 | 5H | -2.05386 | 0.33654  | 1.14647  | 6H | -2.15092 | 1.38435 | -0.28642 | 7O | 1.36873  | -1.21248 | -0.36602 | 8N | 1.16897  | 1.68815 | -0.00916 | 9H | 0.79672  | 2.61874  | 0.1422   | 10H | 1.22601  | 1.52627  | -1.00938 | 11H | 2.11707  | 1.66793  | 0.34879  |
| 1P                                                                                  | 0.28799                                                                                                                                                                                                                                                                                                                                                                                                                                                                                                                                                                                                                                                                                                                                                                                                                                                                                                                                                                                                                | -0.61874 | 0.45685  |          |          |    |          |          |          |    |          |          |          |    |          |          |          |    |          |          |          |    |          |         |          |    |          |          |          |    |          |         |          |    |          |          |          |     |          |          |          |     |          |          |          |
| 2O                                                                                  | -0.96855                                                                                                                                                                                                                                                                                                                                                                                                                                                                                                                                                                                                                                                                                                                                                                                                                                                                                                                                                                                                               | -0.28797 | -0.53356 |          |          |    |          |          |          |    |          |          |          |    |          |          |          |    |          |          |          |    |          |         |          |    |          |          |          |    |          |         |          |    |          |          |          |     |          |          |          |     |          |          |          |
| 3C                                                                                  | -2.10692                                                                                                                                                                                                                                                                                                                                                                                                                                                                                                                                                                                                                                                                                                                                                                                                                                                                                                                                                                                                               | 0.35206  | 0.05583  |          |          |    |          |          |          |    |          |          |          |    |          |          |          |    |          |          |          |    |          |         |          |    |          |          |          |    |          |         |          |    |          |          |          |     |          |          |          |     |          |          |          |
| 4H                                                                                  | -2.99768                                                                                                                                                                                                                                                                                                                                                                                                                                                                                                                                                                                                                                                                                                                                                                                                                                                                                                                                                                                                               | -0.17845 | -0.26858 |          |          |    |          |          |          |    |          |          |          |    |          |          |          |    |          |          |          |    |          |         |          |    |          |          |          |    |          |         |          |    |          |          |          |     |          |          |          |     |          |          |          |
| 5H                                                                                  | -2.05386                                                                                                                                                                                                                                                                                                                                                                                                                                                                                                                                                                                                                                                                                                                                                                                                                                                                                                                                                                                                               | 0.33654  | 1.14647  |          |          |    |          |          |          |    |          |          |          |    |          |          |          |    |          |          |          |    |          |         |          |    |          |          |          |    |          |         |          |    |          |          |          |     |          |          |          |     |          |          |          |
| 6H                                                                                  | -2.15092                                                                                                                                                                                                                                                                                                                                                                                                                                                                                                                                                                                                                                                                                                                                                                                                                                                                                                                                                                                                               | 1.38435  | -0.28642 |          |          |    |          |          |          |    |          |          |          |    |          |          |          |    |          |          |          |    |          |         |          |    |          |          |          |    |          |         |          |    |          |          |          |     |          |          |          |     |          |          |          |
| 7O                                                                                  | 1.36873                                                                                                                                                                                                                                                                                                                                                                                                                                                                                                                                                                                                                                                                                                                                                                                                                                                                                                                                                                                                                | -1.21248 | -0.36602 |          |          |    |          |          |          |    |          |          |          |    |          |          |          |    |          |          |          |    |          |         |          |    |          |          |          |    |          |         |          |    |          |          |          |     |          |          |          |     |          |          |          |
| 8N                                                                                  | 1.16897                                                                                                                                                                                                                                                                                                                                                                                                                                                                                                                                                                                                                                                                                                                                                                                                                                                                                                                                                                                                                | 1.68815  | -0.00916 |          |          |    |          |          |          |    |          |          |          |    |          |          |          |    |          |          |          |    |          |         |          |    |          |          |          |    |          |         |          |    |          |          |          |     |          |          |          |     |          |          |          |
| 9H                                                                                  | 0.79672                                                                                                                                                                                                                                                                                                                                                                                                                                                                                                                                                                                                                                                                                                                                                                                                                                                                                                                                                                                                                | 2.61874  | 0.1422   |          |          |    |          |          |          |    |          |          |          |    |          |          |          |    |          |          |          |    |          |         |          |    |          |          |          |    |          |         |          |    |          |          |          |     |          |          |          |     |          |          |          |
| 10H                                                                                 | 1.22601                                                                                                                                                                                                                                                                                                                                                                                                                                                                                                                                                                                                                                                                                                                                                                                                                                                                                                                                                                                                                | 1.52627  | -1.00938 |          |          |    |          |          |          |    |          |          |          |    |          |          |          |    |          |          |          |    |          |         |          |    |          |          |          |    |          |         |          |    |          |          |          |     |          |          |          |     |          |          |          |
| 11H                                                                                 | 2.11707                                                                                                                                                                                                                                                                                                                                                                                                                                                                                                                                                                                                                                                                                                                                                                                                                                                                                                                                                                                                                | 1.66793  | 0.34879  |          |          |    |          |          |          |    |          |          |          |    |          |          |          |    |          |          |          |    |          |         |          |    |          |          |          |    |          |         |          |    |          |          |          |     |          |          |          |     |          |          |          |
|    | <p><math>\text{H}_2\text{O}\cdots\text{trans-CH}_3\text{OPO}</math><br/> <math>E_{\text{CCSD(T)}} = -607.410050</math> <math>E_{\text{ZPVE}} = 0.070009</math></p> <table border="1"> <tbody> <tr><td>1P</td><td>0.36288</td><td>-0.76493</td><td>0.4464</td></tr> <tr><td>2O</td><td>-0.85492</td><td>-0.35906</td><td>-0.5505</td></tr> <tr><td>3C</td><td>-2.06809</td><td>0.13799</td><td>0.04455</td></tr> <tr><td>4H</td><td>-2.90068</td><td>-0.36814</td><td>-0.43389</td></tr> <tr><td>5H</td><td>-2.09009</td><td>-0.05336</td><td>1.11844</td></tr> <tr><td>6H</td><td>-2.11936</td><td>1.20846</td><td>-0.13321</td></tr> <tr><td>7O</td><td>1.57277</td><td>-1.01177</td><td>-0.38489</td></tr> <tr><td>8O</td><td>0.72078</td><td>2.07353</td><td>0.0333</td></tr> <tr><td>9H</td><td>1.43975</td><td>2.55961</td><td>0.44992</td></tr> <tr><td>10H</td><td>1.1267</td><td>1.6779</td><td>-0.74774</td></tr> </tbody> </table>                                                                           | 1P       | 0.36288  | -0.76493 | 0.4464   | 2O | -0.85492 | -0.35906 | -0.5505  | 3C | -2.06809 | 0.13799  | 0.04455  | 4H | -2.90068 | -0.36814 | -0.43389 | 5H | -2.09009 | -0.05336 | 1.11844  | 6H | -2.11936 | 1.20846 | -0.13321 | 7O | 1.57277  | -1.01177 | -0.38489 | 8O | 0.72078  | 2.07353 | 0.0333   | 9H | 1.43975  | 2.55961  | 0.44992  | 10H | 1.1267   | 1.6779   | -0.74774 |     |          |          |          |
| 1P                                                                                  | 0.36288                                                                                                                                                                                                                                                                                                                                                                                                                                                                                                                                                                                                                                                                                                                                                                                                                                                                                                                                                                                                                | -0.76493 | 0.4464   |          |          |    |          |          |          |    |          |          |          |    |          |          |          |    |          |          |          |    |          |         |          |    |          |          |          |    |          |         |          |    |          |          |          |     |          |          |          |     |          |          |          |
| 2O                                                                                  | -0.85492                                                                                                                                                                                                                                                                                                                                                                                                                                                                                                                                                                                                                                                                                                                                                                                                                                                                                                                                                                                                               | -0.35906 | -0.5505  |          |          |    |          |          |          |    |          |          |          |    |          |          |          |    |          |          |          |    |          |         |          |    |          |          |          |    |          |         |          |    |          |          |          |     |          |          |          |     |          |          |          |
| 3C                                                                                  | -2.06809                                                                                                                                                                                                                                                                                                                                                                                                                                                                                                                                                                                                                                                                                                                                                                                                                                                                                                                                                                                                               | 0.13799  | 0.04455  |          |          |    |          |          |          |    |          |          |          |    |          |          |          |    |          |          |          |    |          |         |          |    |          |          |          |    |          |         |          |    |          |          |          |     |          |          |          |     |          |          |          |
| 4H                                                                                  | -2.90068                                                                                                                                                                                                                                                                                                                                                                                                                                                                                                                                                                                                                                                                                                                                                                                                                                                                                                                                                                                                               | -0.36814 | -0.43389 |          |          |    |          |          |          |    |          |          |          |    |          |          |          |    |          |          |          |    |          |         |          |    |          |          |          |    |          |         |          |    |          |          |          |     |          |          |          |     |          |          |          |
| 5H                                                                                  | -2.09009                                                                                                                                                                                                                                                                                                                                                                                                                                                                                                                                                                                                                                                                                                                                                                                                                                                                                                                                                                                                               | -0.05336 | 1.11844  |          |          |    |          |          |          |    |          |          |          |    |          |          |          |    |          |          |          |    |          |         |          |    |          |          |          |    |          |         |          |    |          |          |          |     |          |          |          |     |          |          |          |
| 6H                                                                                  | -2.11936                                                                                                                                                                                                                                                                                                                                                                                                                                                                                                                                                                                                                                                                                                                                                                                                                                                                                                                                                                                                               | 1.20846  | -0.13321 |          |          |    |          |          |          |    |          |          |          |    |          |          |          |    |          |          |          |    |          |         |          |    |          |          |          |    |          |         |          |    |          |          |          |     |          |          |          |     |          |          |          |
| 7O                                                                                  | 1.57277                                                                                                                                                                                                                                                                                                                                                                                                                                                                                                                                                                                                                                                                                                                                                                                                                                                                                                                                                                                                                | -1.01177 | -0.38489 |          |          |    |          |          |          |    |          |          |          |    |          |          |          |    |          |          |          |    |          |         |          |    |          |          |          |    |          |         |          |    |          |          |          |     |          |          |          |     |          |          |          |
| 8O                                                                                  | 0.72078                                                                                                                                                                                                                                                                                                                                                                                                                                                                                                                                                                                                                                                                                                                                                                                                                                                                                                                                                                                                                | 2.07353  | 0.0333   |          |          |    |          |          |          |    |          |          |          |    |          |          |          |    |          |          |          |    |          |         |          |    |          |          |          |    |          |         |          |    |          |          |          |     |          |          |          |     |          |          |          |
| 9H                                                                                  | 1.43975                                                                                                                                                                                                                                                                                                                                                                                                                                                                                                                                                                                                                                                                                                                                                                                                                                                                                                                                                                                                                | 2.55961  | 0.44992  |          |          |    |          |          |          |    |          |          |          |    |          |          |          |    |          |          |          |    |          |         |          |    |          |          |          |    |          |         |          |    |          |          |          |     |          |          |          |     |          |          |          |
| 10H                                                                                 | 1.1267                                                                                                                                                                                                                                                                                                                                                                                                                                                                                                                                                                                                                                                                                                                                                                                                                                                                                                                                                                                                                 | 1.6779   | -0.74774 |          |          |    |          |          |          |    |          |          |          |    |          |          |          |    |          |          |          |    |          |         |          |    |          |          |          |    |          |         |          |    |          |          |          |     |          |          |          |     |          |          |          |
|  | <p><math>\text{H}_3\text{N}\cdots\text{cis-CH}_3\text{OPO}</math><br/> <math>E_{\text{CCSD(T)}} = -587.554003</math> <math>E_{\text{ZPVE}} = 0.083524</math></p> <table border="1"> <tbody> <tr><td>1P</td><td>-0.19891</td><td>-0.77405</td><td>-0.50793</td></tr> <tr><td>2O</td><td>0.98809</td><td>0.31681</td><td>-0.69344</td></tr> <tr><td>3C</td><td>1.70158</td><td>0.84628</td><td>0.4354</td></tr> <tr><td>4H</td><td>1.2062</td><td>1.75416</td><td>0.77788</td></tr> <tr><td>5H</td><td>1.73184</td><td>0.11974</td><td>1.24403</td></tr> <tr><td>6H</td><td>2.705</td><td>1.08469</td><td>0.09655</td></tr> <tr><td>7O</td><td>-0.23048</td><td>-1.29047</td><td>0.88896</td></tr> <tr><td>8N</td><td>-1.81956</td><td>1.07257</td><td>0.08355</td></tr> <tr><td>9H</td><td>-1.72346</td><td>1.02835</td><td>1.09231</td></tr> <tr><td>10H</td><td>-2.76682</td><td>0.79234</td><td>-0.14222</td></tr> <tr><td>11H</td><td>-1.70256</td><td>2.03504</td><td>-0.21099</td></tr> </tbody> </table>         | 1P       | -0.19891 | -0.77405 | -0.50793 | 2O | 0.98809  | 0.31681  | -0.69344 | 3C | 1.70158  | 0.84628  | 0.4354   | 4H | 1.2062   | 1.75416  | 0.77788  | 5H | 1.73184  | 0.11974  | 1.24403  | 6H | 2.705    | 1.08469 | 0.09655  | 7O | -0.23048 | -1.29047 | 0.88896  | 8N | -1.81956 | 1.07257 | 0.08355  | 9H | -1.72346 | 1.02835  | 1.09231  | 10H | -2.76682 | 0.79234  | -0.14222 | 11H | -1.70256 | 2.03504  | -0.21099 |
| 1P                                                                                  | -0.19891                                                                                                                                                                                                                                                                                                                                                                                                                                                                                                                                                                                                                                                                                                                                                                                                                                                                                                                                                                                                               | -0.77405 | -0.50793 |          |          |    |          |          |          |    |          |          |          |    |          |          |          |    |          |          |          |    |          |         |          |    |          |          |          |    |          |         |          |    |          |          |          |     |          |          |          |     |          |          |          |
| 2O                                                                                  | 0.98809                                                                                                                                                                                                                                                                                                                                                                                                                                                                                                                                                                                                                                                                                                                                                                                                                                                                                                                                                                                                                | 0.31681  | -0.69344 |          |          |    |          |          |          |    |          |          |          |    |          |          |          |    |          |          |          |    |          |         |          |    |          |          |          |    |          |         |          |    |          |          |          |     |          |          |          |     |          |          |          |
| 3C                                                                                  | 1.70158                                                                                                                                                                                                                                                                                                                                                                                                                                                                                                                                                                                                                                                                                                                                                                                                                                                                                                                                                                                                                | 0.84628  | 0.4354   |          |          |    |          |          |          |    |          |          |          |    |          |          |          |    |          |          |          |    |          |         |          |    |          |          |          |    |          |         |          |    |          |          |          |     |          |          |          |     |          |          |          |
| 4H                                                                                  | 1.2062                                                                                                                                                                                                                                                                                                                                                                                                                                                                                                                                                                                                                                                                                                                                                                                                                                                                                                                                                                                                                 | 1.75416  | 0.77788  |          |          |    |          |          |          |    |          |          |          |    |          |          |          |    |          |          |          |    |          |         |          |    |          |          |          |    |          |         |          |    |          |          |          |     |          |          |          |     |          |          |          |
| 5H                                                                                  | 1.73184                                                                                                                                                                                                                                                                                                                                                                                                                                                                                                                                                                                                                                                                                                                                                                                                                                                                                                                                                                                                                | 0.11974  | 1.24403  |          |          |    |          |          |          |    |          |          |          |    |          |          |          |    |          |          |          |    |          |         |          |    |          |          |          |    |          |         |          |    |          |          |          |     |          |          |          |     |          |          |          |
| 6H                                                                                  | 2.705                                                                                                                                                                                                                                                                                                                                                                                                                                                                                                                                                                                                                                                                                                                                                                                                                                                                                                                                                                                                                  | 1.08469  | 0.09655  |          |          |    |          |          |          |    |          |          |          |    |          |          |          |    |          |          |          |    |          |         |          |    |          |          |          |    |          |         |          |    |          |          |          |     |          |          |          |     |          |          |          |
| 7O                                                                                  | -0.23048                                                                                                                                                                                                                                                                                                                                                                                                                                                                                                                                                                                                                                                                                                                                                                                                                                                                                                                                                                                                               | -1.29047 | 0.88896  |          |          |    |          |          |          |    |          |          |          |    |          |          |          |    |          |          |          |    |          |         |          |    |          |          |          |    |          |         |          |    |          |          |          |     |          |          |          |     |          |          |          |
| 8N                                                                                  | -1.81956                                                                                                                                                                                                                                                                                                                                                                                                                                                                                                                                                                                                                                                                                                                                                                                                                                                                                                                                                                                                               | 1.07257  | 0.08355  |          |          |    |          |          |          |    |          |          |          |    |          |          |          |    |          |          |          |    |          |         |          |    |          |          |          |    |          |         |          |    |          |          |          |     |          |          |          |     |          |          |          |
| 9H                                                                                  | -1.72346                                                                                                                                                                                                                                                                                                                                                                                                                                                                                                                                                                                                                                                                                                                                                                                                                                                                                                                                                                                                               | 1.02835  | 1.09231  |          |          |    |          |          |          |    |          |          |          |    |          |          |          |    |          |          |          |    |          |         |          |    |          |          |          |    |          |         |          |    |          |          |          |     |          |          |          |     |          |          |          |
| 10H                                                                                 | -2.76682                                                                                                                                                                                                                                                                                                                                                                                                                                                                                                                                                                                                                                                                                                                                                                                                                                                                                                                                                                                                               | 0.79234  | -0.14222 |          |          |    |          |          |          |    |          |          |          |    |          |          |          |    |          |          |          |    |          |         |          |    |          |          |          |    |          |         |          |    |          |          |          |     |          |          |          |     |          |          |          |
| 11H                                                                                 | -1.70256                                                                                                                                                                                                                                                                                                                                                                                                                                                                                                                                                                                                                                                                                                                                                                                                                                                                                                                                                                                                               | 2.03504  | -0.21099 |          |          |    |          |          |          |    |          |          |          |    |          |          |          |    |          |          |          |    |          |         |          |    |          |          |          |    |          |         |          |    |          |          |          |     |          |          |          |     |          |          |          |
|  | <p><math>\text{CH}_3\text{OPO}_2\cdots\text{HNC}</math><br/> <math>E_{\text{CCSD(T)}} = -699.504018</math> <math>E_{\text{ZPVE}} = 0.070260</math></p> <table border="1"> <tbody> <tr><td>1C</td><td>1.86521</td><td>-1.34633</td><td>-0.09201</td></tr> <tr><td>2H</td><td>2.3935</td><td>-0.92033</td><td>0.75575</td></tr> <tr><td>3H</td><td>2.56189</td><td>-1.75855</td><td>-0.81451</td></tr> <tr><td>4H</td><td>1.19246</td><td>-2.1288</td><td>0.25904</td></tr> <tr><td>5O</td><td>1.12582</td><td>-0.32804</td><td>-0.79036</td></tr> <tr><td>6P</td><td>0.16856</td><td>0.63097</td><td>0.06145</td></tr> <tr><td>7O</td><td>0.44286</td><td>0.57822</td><td>1.5171</td></tr> <tr><td>8O</td><td>-0.36437</td><td>1.72323</td><td>-0.77864</td></tr> <tr><td>9H</td><td>-3.39677</td><td>-1.49442</td><td>-0.01036</td></tr> <tr><td>10N</td><td>-2.48837</td><td>-1.07513</td><td>-0.00997</td></tr> <tr><td>11C</td><td>-1.44778</td><td>-0.55765</td><td>-0.01244</td></tr> </tbody> </table>           | 1C       | 1.86521  | -1.34633 | -0.09201 | 2H | 2.3935   | -0.92033 | 0.75575  | 3H | 2.56189  | -1.75855 | -0.81451 | 4H | 1.19246  | -2.1288  | 0.25904  | 5O | 1.12582  | -0.32804 | -0.79036 | 6P | 0.16856  | 0.63097 | 0.06145  | 7O | 0.44286  | 0.57822  | 1.5171   | 8O | -0.36437 | 1.72323 | -0.77864 | 9H | -3.39677 | -1.49442 | -0.01036 | 10N | -2.48837 | -1.07513 | -0.00997 | 11C | -1.44778 | -0.55765 | -0.01244 |
| 1C                                                                                  | 1.86521                                                                                                                                                                                                                                                                                                                                                                                                                                                                                                                                                                                                                                                                                                                                                                                                                                                                                                                                                                                                                | -1.34633 | -0.09201 |          |          |    |          |          |          |    |          |          |          |    |          |          |          |    |          |          |          |    |          |         |          |    |          |          |          |    |          |         |          |    |          |          |          |     |          |          |          |     |          |          |          |
| 2H                                                                                  | 2.3935                                                                                                                                                                                                                                                                                                                                                                                                                                                                                                                                                                                                                                                                                                                                                                                                                                                                                                                                                                                                                 | -0.92033 | 0.75575  |          |          |    |          |          |          |    |          |          |          |    |          |          |          |    |          |          |          |    |          |         |          |    |          |          |          |    |          |         |          |    |          |          |          |     |          |          |          |     |          |          |          |
| 3H                                                                                  | 2.56189                                                                                                                                                                                                                                                                                                                                                                                                                                                                                                                                                                                                                                                                                                                                                                                                                                                                                                                                                                                                                | -1.75855 | -0.81451 |          |          |    |          |          |          |    |          |          |          |    |          |          |          |    |          |          |          |    |          |         |          |    |          |          |          |    |          |         |          |    |          |          |          |     |          |          |          |     |          |          |          |
| 4H                                                                                  | 1.19246                                                                                                                                                                                                                                                                                                                                                                                                                                                                                                                                                                                                                                                                                                                                                                                                                                                                                                                                                                                                                | -2.1288  | 0.25904  |          |          |    |          |          |          |    |          |          |          |    |          |          |          |    |          |          |          |    |          |         |          |    |          |          |          |    |          |         |          |    |          |          |          |     |          |          |          |     |          |          |          |
| 5O                                                                                  | 1.12582                                                                                                                                                                                                                                                                                                                                                                                                                                                                                                                                                                                                                                                                                                                                                                                                                                                                                                                                                                                                                | -0.32804 | -0.79036 |          |          |    |          |          |          |    |          |          |          |    |          |          |          |    |          |          |          |    |          |         |          |    |          |          |          |    |          |         |          |    |          |          |          |     |          |          |          |     |          |          |          |
| 6P                                                                                  | 0.16856                                                                                                                                                                                                                                                                                                                                                                                                                                                                                                                                                                                                                                                                                                                                                                                                                                                                                                                                                                                                                | 0.63097  | 0.06145  |          |          |    |          |          |          |    |          |          |          |    |          |          |          |    |          |          |          |    |          |         |          |    |          |          |          |    |          |         |          |    |          |          |          |     |          |          |          |     |          |          |          |
| 7O                                                                                  | 0.44286                                                                                                                                                                                                                                                                                                                                                                                                                                                                                                                                                                                                                                                                                                                                                                                                                                                                                                                                                                                                                | 0.57822  | 1.5171   |          |          |    |          |          |          |    |          |          |          |    |          |          |          |    |          |          |          |    |          |         |          |    |          |          |          |    |          |         |          |    |          |          |          |     |          |          |          |     |          |          |          |
| 8O                                                                                  | -0.36437                                                                                                                                                                                                                                                                                                                                                                                                                                                                                                                                                                                                                                                                                                                                                                                                                                                                                                                                                                                                               | 1.72323  | -0.77864 |          |          |    |          |          |          |    |          |          |          |    |          |          |          |    |          |          |          |    |          |         |          |    |          |          |          |    |          |         |          |    |          |          |          |     |          |          |          |     |          |          |          |
| 9H                                                                                  | -3.39677                                                                                                                                                                                                                                                                                                                                                                                                                                                                                                                                                                                                                                                                                                                                                                                                                                                                                                                                                                                                               | -1.49442 | -0.01036 |          |          |    |          |          |          |    |          |          |          |    |          |          |          |    |          |          |          |    |          |         |          |    |          |          |          |    |          |         |          |    |          |          |          |     |          |          |          |     |          |          |          |
| 10N                                                                                 | -2.48837                                                                                                                                                                                                                                                                                                                                                                                                                                                                                                                                                                                                                                                                                                                                                                                                                                                                                                                                                                                                               | -1.07513 | -0.00997 |          |          |    |          |          |          |    |          |          |          |    |          |          |          |    |          |          |          |    |          |         |          |    |          |          |          |    |          |         |          |    |          |          |          |     |          |          |          |     |          |          |          |
| 11C                                                                                 | -1.44778                                                                                                                                                                                                                                                                                                                                                                                                                                                                                                                                                                                                                                                                                                                                                                                                                                                                                                                                                                                                               | -0.55765 | -0.01244 |          |          |    |          |          |          |    |          |          |          |    |          |          |          |    |          |          |          |    |          |         |          |    |          |          |          |    |          |         |          |    |          |          |          |     |          |          |          |     |          |          |          |



|     |                                                                                                                                                                                                                                                                                                                                                                                                                                                                                                                                                                                                                                                                                                                                                                                                                                                                                                                                                                                                                                                                                |          |          |         |          |    |          |         |          |    |          |         |          |    |          |         |          |    |          |          |          |    |          |          |          |    |          |         |          |    |          |          |          |    |          |          |          |     |          |          |          |     |          |          |          |     |          |          |          |
|-----|--------------------------------------------------------------------------------------------------------------------------------------------------------------------------------------------------------------------------------------------------------------------------------------------------------------------------------------------------------------------------------------------------------------------------------------------------------------------------------------------------------------------------------------------------------------------------------------------------------------------------------------------------------------------------------------------------------------------------------------------------------------------------------------------------------------------------------------------------------------------------------------------------------------------------------------------------------------------------------------------------------------------------------------------------------------------------------|----------|----------|---------|----------|----|----------|---------|----------|----|----------|---------|----------|----|----------|---------|----------|----|----------|----------|----------|----|----------|----------|----------|----|----------|---------|----------|----|----------|----------|----------|----|----------|----------|----------|-----|----------|----------|----------|-----|----------|----------|----------|-----|----------|----------|----------|
|     | <p>CH<sub>3</sub>OPO<sub>2</sub>...HCCH</p> <p><math>E_{\text{CCSD(T)}} = -683.423594</math>    <math>E_{\text{ZPVE}} = 0.079359</math></p> <table border="1"> <tbody> <tr><td>1C</td><td>0.26371</td><td>2.36093</td><td>0.000000</td></tr> <tr><td>2H</td><td>1.33269</td><td>2.54883</td><td>0.000000</td></tr> <tr><td>3H</td><td>-0.20331</td><td>2.76594</td><td>0.89112</td></tr> <tr><td>4H</td><td>-0.20331</td><td>2.76594</td><td>-0.89112</td></tr> <tr><td>5O</td><td>0.00000</td><td>0.93244</td><td>0.000000</td></tr> <tr><td>6P</td><td>1.16187</td><td>-0.11968</td><td>0.000000</td></tr> <tr><td>7O</td><td>2.52127</td><td>0.43174</td><td>0.000000</td></tr> <tr><td>8O</td><td>0.65102</td><td>-1.49219</td><td>0.000000</td></tr> <tr><td>9C</td><td>-3.83701</td><td>-1.29735</td><td>0.000000</td></tr> <tr><td>H10</td><td>-4.88795</td><td>-1.14437</td><td>0.000000</td></tr> <tr><td>11C</td><td>-2.63698</td><td>-1.47737</td><td>0.000000</td></tr> <tr><td>12H</td><td>-1.58278</td><td>-1.63428</td><td>0.000000</td></tr> </tbody> </table> | 1C       | 0.26371  | 2.36093 | 0.000000 | 2H | 1.33269  | 2.54883 | 0.000000 | 3H | -0.20331 | 2.76594 | 0.89112  | 4H | -0.20331 | 2.76594 | -0.89112 | 5O | 0.00000  | 0.93244  | 0.000000 | 6P | 1.16187  | -0.11968 | 0.000000 | 7O | 2.52127  | 0.43174 | 0.000000 | 8O | 0.65102  | -1.49219 | 0.000000 | 9C | -3.83701 | -1.29735 | 0.000000 | H10 | -4.88795 | -1.14437 | 0.000000 | 11C | -2.63698 | -1.47737 | 0.000000 | 12H | -1.58278 | -1.63428 | 0.000000 |
| 1C  | 0.26371                                                                                                                                                                                                                                                                                                                                                                                                                                                                                                                                                                                                                                                                                                                                                                                                                                                                                                                                                                                                                                                                        | 2.36093  | 0.000000 |         |          |    |          |         |          |    |          |         |          |    |          |         |          |    |          |          |          |    |          |          |          |    |          |         |          |    |          |          |          |    |          |          |          |     |          |          |          |     |          |          |          |     |          |          |          |
| 2H  | 1.33269                                                                                                                                                                                                                                                                                                                                                                                                                                                                                                                                                                                                                                                                                                                                                                                                                                                                                                                                                                                                                                                                        | 2.54883  | 0.000000 |         |          |    |          |         |          |    |          |         |          |    |          |         |          |    |          |          |          |    |          |          |          |    |          |         |          |    |          |          |          |    |          |          |          |     |          |          |          |     |          |          |          |     |          |          |          |
| 3H  | -0.20331                                                                                                                                                                                                                                                                                                                                                                                                                                                                                                                                                                                                                                                                                                                                                                                                                                                                                                                                                                                                                                                                       | 2.76594  | 0.89112  |         |          |    |          |         |          |    |          |         |          |    |          |         |          |    |          |          |          |    |          |          |          |    |          |         |          |    |          |          |          |    |          |          |          |     |          |          |          |     |          |          |          |     |          |          |          |
| 4H  | -0.20331                                                                                                                                                                                                                                                                                                                                                                                                                                                                                                                                                                                                                                                                                                                                                                                                                                                                                                                                                                                                                                                                       | 2.76594  | -0.89112 |         |          |    |          |         |          |    |          |         |          |    |          |         |          |    |          |          |          |    |          |          |          |    |          |         |          |    |          |          |          |    |          |          |          |     |          |          |          |     |          |          |          |     |          |          |          |
| 5O  | 0.00000                                                                                                                                                                                                                                                                                                                                                                                                                                                                                                                                                                                                                                                                                                                                                                                                                                                                                                                                                                                                                                                                        | 0.93244  | 0.000000 |         |          |    |          |         |          |    |          |         |          |    |          |         |          |    |          |          |          |    |          |          |          |    |          |         |          |    |          |          |          |    |          |          |          |     |          |          |          |     |          |          |          |     |          |          |          |
| 6P  | 1.16187                                                                                                                                                                                                                                                                                                                                                                                                                                                                                                                                                                                                                                                                                                                                                                                                                                                                                                                                                                                                                                                                        | -0.11968 | 0.000000 |         |          |    |          |         |          |    |          |         |          |    |          |         |          |    |          |          |          |    |          |          |          |    |          |         |          |    |          |          |          |    |          |          |          |     |          |          |          |     |          |          |          |     |          |          |          |
| 7O  | 2.52127                                                                                                                                                                                                                                                                                                                                                                                                                                                                                                                                                                                                                                                                                                                                                                                                                                                                                                                                                                                                                                                                        | 0.43174  | 0.000000 |         |          |    |          |         |          |    |          |         |          |    |          |         |          |    |          |          |          |    |          |          |          |    |          |         |          |    |          |          |          |    |          |          |          |     |          |          |          |     |          |          |          |     |          |          |          |
| 8O  | 0.65102                                                                                                                                                                                                                                                                                                                                                                                                                                                                                                                                                                                                                                                                                                                                                                                                                                                                                                                                                                                                                                                                        | -1.49219 | 0.000000 |         |          |    |          |         |          |    |          |         |          |    |          |         |          |    |          |          |          |    |          |          |          |    |          |         |          |    |          |          |          |    |          |          |          |     |          |          |          |     |          |          |          |     |          |          |          |
| 9C  | -3.83701                                                                                                                                                                                                                                                                                                                                                                                                                                                                                                                                                                                                                                                                                                                                                                                                                                                                                                                                                                                                                                                                       | -1.29735 | 0.000000 |         |          |    |          |         |          |    |          |         |          |    |          |         |          |    |          |          |          |    |          |          |          |    |          |         |          |    |          |          |          |    |          |          |          |     |          |          |          |     |          |          |          |     |          |          |          |
| H10 | -4.88795                                                                                                                                                                                                                                                                                                                                                                                                                                                                                                                                                                                                                                                                                                                                                                                                                                                                                                                                                                                                                                                                       | -1.14437 | 0.000000 |         |          |    |          |         |          |    |          |         |          |    |          |         |          |    |          |          |          |    |          |          |          |    |          |         |          |    |          |          |          |    |          |          |          |     |          |          |          |     |          |          |          |     |          |          |          |
| 11C | -2.63698                                                                                                                                                                                                                                                                                                                                                                                                                                                                                                                                                                                                                                                                                                                                                                                                                                                                                                                                                                                                                                                                       | -1.47737 | 0.000000 |         |          |    |          |         |          |    |          |         |          |    |          |         |          |    |          |          |          |    |          |          |          |    |          |         |          |    |          |          |          |    |          |          |          |     |          |          |          |     |          |          |          |     |          |          |          |
| 12H | -1.58278                                                                                                                                                                                                                                                                                                                                                                                                                                                                                                                                                                                                                                                                                                                                                                                                                                                                                                                                                                                                                                                                       | -1.63428 | 0.000000 |         |          |    |          |         |          |    |          |         |          |    |          |         |          |    |          |          |          |    |          |          |          |    |          |         |          |    |          |          |          |    |          |          |          |     |          |          |          |     |          |          |          |     |          |          |          |
|     | <p>CH<sub>3</sub>PO<sub>2</sub>...H<sub>2</sub>O</p> <p><math>E_{\text{CCSD(T)}} = -607.434626</math>    <math>E_{\text{ZPVE}} = 0.069779</math></p> <table border="1"> <tbody> <tr><td>1C</td><td>-0.07109</td><td>1.5093</td><td>0.10671</td></tr> <tr><td>2H</td><td>-0.11362</td><td>1.81647</td><td>1.15195</td></tr> <tr><td>3H</td><td>-0.68002</td><td>2.18102</td><td>-0.49033</td></tr> <tr><td>4H</td><td>0.96749</td><td>1.47562</td><td>-0.21355</td></tr> <tr><td>5P</td><td>-0.76636</td><td>-0.14555</td><td>0.01622</td></tr> <tr><td>6O</td><td>0.22288</td><td>-1.23277</td><td>0.20756</td></tr> <tr><td>7O</td><td>-2.22406</td><td>-0.206</td><td>-0.20928</td></tr> <tr><td>8O</td><td>2.75945</td><td>0.03246</td><td>-0.13562</td></tr> <tr><td>9H</td><td>2.09423</td><td>-0.65502</td><td>0.01911</td></tr> <tr><td>10H</td><td>3.58766</td><td>-0.44021</td><td>-0.25198</td></tr> </tbody> </table>                                                                                                                                               | 1C       | -0.07109 | 1.5093  | 0.10671  | 2H | -0.11362 | 1.81647 | 1.15195  | 3H | -0.68002 | 2.18102 | -0.49033 | 4H | 0.96749  | 1.47562 | -0.21355 | 5P | -0.76636 | -0.14555 | 0.01622  | 6O | 0.22288  | -1.23277 | 0.20756  | 7O | -2.22406 | -0.206  | -0.20928 | 8O | 2.75945  | 0.03246  | -0.13562 | 9H | 2.09423  | -0.65502 | 0.01911  | 10H | 3.58766  | -0.44021 | -0.25198 |     |          |          |          |     |          |          |          |
| 1C  | -0.07109                                                                                                                                                                                                                                                                                                                                                                                                                                                                                                                                                                                                                                                                                                                                                                                                                                                                                                                                                                                                                                                                       | 1.5093   | 0.10671  |         |          |    |          |         |          |    |          |         |          |    |          |         |          |    |          |          |          |    |          |          |          |    |          |         |          |    |          |          |          |    |          |          |          |     |          |          |          |     |          |          |          |     |          |          |          |
| 2H  | -0.11362                                                                                                                                                                                                                                                                                                                                                                                                                                                                                                                                                                                                                                                                                                                                                                                                                                                                                                                                                                                                                                                                       | 1.81647  | 1.15195  |         |          |    |          |         |          |    |          |         |          |    |          |         |          |    |          |          |          |    |          |          |          |    |          |         |          |    |          |          |          |    |          |          |          |     |          |          |          |     |          |          |          |     |          |          |          |
| 3H  | -0.68002                                                                                                                                                                                                                                                                                                                                                                                                                                                                                                                                                                                                                                                                                                                                                                                                                                                                                                                                                                                                                                                                       | 2.18102  | -0.49033 |         |          |    |          |         |          |    |          |         |          |    |          |         |          |    |          |          |          |    |          |          |          |    |          |         |          |    |          |          |          |    |          |          |          |     |          |          |          |     |          |          |          |     |          |          |          |
| 4H  | 0.96749                                                                                                                                                                                                                                                                                                                                                                                                                                                                                                                                                                                                                                                                                                                                                                                                                                                                                                                                                                                                                                                                        | 1.47562  | -0.21355 |         |          |    |          |         |          |    |          |         |          |    |          |         |          |    |          |          |          |    |          |          |          |    |          |         |          |    |          |          |          |    |          |          |          |     |          |          |          |     |          |          |          |     |          |          |          |
| 5P  | -0.76636                                                                                                                                                                                                                                                                                                                                                                                                                                                                                                                                                                                                                                                                                                                                                                                                                                                                                                                                                                                                                                                                       | -0.14555 | 0.01622  |         |          |    |          |         |          |    |          |         |          |    |          |         |          |    |          |          |          |    |          |          |          |    |          |         |          |    |          |          |          |    |          |          |          |     |          |          |          |     |          |          |          |     |          |          |          |
| 6O  | 0.22288                                                                                                                                                                                                                                                                                                                                                                                                                                                                                                                                                                                                                                                                                                                                                                                                                                                                                                                                                                                                                                                                        | -1.23277 | 0.20756  |         |          |    |          |         |          |    |          |         |          |    |          |         |          |    |          |          |          |    |          |          |          |    |          |         |          |    |          |          |          |    |          |          |          |     |          |          |          |     |          |          |          |     |          |          |          |
| 7O  | -2.22406                                                                                                                                                                                                                                                                                                                                                                                                                                                                                                                                                                                                                                                                                                                                                                                                                                                                                                                                                                                                                                                                       | -0.206   | -0.20928 |         |          |    |          |         |          |    |          |         |          |    |          |         |          |    |          |          |          |    |          |          |          |    |          |         |          |    |          |          |          |    |          |          |          |     |          |          |          |     |          |          |          |     |          |          |          |
| 8O  | 2.75945                                                                                                                                                                                                                                                                                                                                                                                                                                                                                                                                                                                                                                                                                                                                                                                                                                                                                                                                                                                                                                                                        | 0.03246  | -0.13562 |         |          |    |          |         |          |    |          |         |          |    |          |         |          |    |          |          |          |    |          |          |          |    |          |         |          |    |          |          |          |    |          |          |          |     |          |          |          |     |          |          |          |     |          |          |          |
| 9H  | 2.09423                                                                                                                                                                                                                                                                                                                                                                                                                                                                                                                                                                                                                                                                                                                                                                                                                                                                                                                                                                                                                                                                        | -0.65502 | 0.01911  |         |          |    |          |         |          |    |          |         |          |    |          |         |          |    |          |          |          |    |          |          |          |    |          |         |          |    |          |          |          |    |          |          |          |     |          |          |          |     |          |          |          |     |          |          |          |
| 10H | 3.58766                                                                                                                                                                                                                                                                                                                                                                                                                                                                                                                                                                                                                                                                                                                                                                                                                                                                                                                                                                                                                                                                        | -0.44021 | -0.25198 |         |          |    |          |         |          |    |          |         |          |    |          |         |          |    |          |          |          |    |          |          |          |    |          |         |          |    |          |          |          |    |          |          |          |     |          |          |          |     |          |          |          |     |          |          |          |
|     | <p>CH<sub>3</sub>PO<sub>2</sub>...HNC</p> <p><math>E_{\text{CCSD(T)}} = -624.351127</math>    <math>E_{\text{ZPVE}} = 0.062819</math></p> <table border="1"> <tbody> <tr><td>1C</td><td>1.55205</td><td>0.21629</td><td>0.00000</td></tr> <tr><td>2H</td><td>1.5732</td><td>-0.4262</td><td>0.8794</td></tr> <tr><td>3H</td><td>2.38159</td><td>0.91476</td><td>0.00000</td></tr> <tr><td>4H</td><td>1.5732</td><td>-0.4262</td><td>-0.8794</td></tr> <tr><td>5P</td><td>0.00000</td><td>1.11202</td><td>0.00000</td></tr> <tr><td>6O</td><td>-1.18053</td><td>0.22687</td><td>0.00000</td></tr> <tr><td>7O</td><td>0.09641</td><td>2.57394</td><td>0.00000</td></tr> <tr><td>8H</td><td>-1.02405</td><td>-1.56478</td><td>0.00000</td></tr> <tr><td>9C</td><td>-0.11246</td><td>-3.55796</td><td>0.00000</td></tr> <tr><td>10N</td><td>-0.63837</td><td>-2.50491</td><td>0.00000</td></tr> </tbody> </table>                                                                                                                                                                  | 1C       | 1.55205  | 0.21629 | 0.00000  | 2H | 1.5732   | -0.4262 | 0.8794   | 3H | 2.38159  | 0.91476 | 0.00000  | 4H | 1.5732   | -0.4262 | -0.8794  | 5P | 0.00000  | 1.11202  | 0.00000  | 6O | -1.18053 | 0.22687  | 0.00000  | 7O | 0.09641  | 2.57394 | 0.00000  | 8H | -1.02405 | -1.56478 | 0.00000  | 9C | -0.11246 | -3.55796 | 0.00000  | 10N | -0.63837 | -2.50491 | 0.00000  |     |          |          |          |     |          |          |          |
| 1C  | 1.55205                                                                                                                                                                                                                                                                                                                                                                                                                                                                                                                                                                                                                                                                                                                                                                                                                                                                                                                                                                                                                                                                        | 0.21629  | 0.00000  |         |          |    |          |         |          |    |          |         |          |    |          |         |          |    |          |          |          |    |          |          |          |    |          |         |          |    |          |          |          |    |          |          |          |     |          |          |          |     |          |          |          |     |          |          |          |
| 2H  | 1.5732                                                                                                                                                                                                                                                                                                                                                                                                                                                                                                                                                                                                                                                                                                                                                                                                                                                                                                                                                                                                                                                                         | -0.4262  | 0.8794   |         |          |    |          |         |          |    |          |         |          |    |          |         |          |    |          |          |          |    |          |          |          |    |          |         |          |    |          |          |          |    |          |          |          |     |          |          |          |     |          |          |          |     |          |          |          |
| 3H  | 2.38159                                                                                                                                                                                                                                                                                                                                                                                                                                                                                                                                                                                                                                                                                                                                                                                                                                                                                                                                                                                                                                                                        | 0.91476  | 0.00000  |         |          |    |          |         |          |    |          |         |          |    |          |         |          |    |          |          |          |    |          |          |          |    |          |         |          |    |          |          |          |    |          |          |          |     |          |          |          |     |          |          |          |     |          |          |          |
| 4H  | 1.5732                                                                                                                                                                                                                                                                                                                                                                                                                                                                                                                                                                                                                                                                                                                                                                                                                                                                                                                                                                                                                                                                         | -0.4262  | -0.8794  |         |          |    |          |         |          |    |          |         |          |    |          |         |          |    |          |          |          |    |          |          |          |    |          |         |          |    |          |          |          |    |          |          |          |     |          |          |          |     |          |          |          |     |          |          |          |
| 5P  | 0.00000                                                                                                                                                                                                                                                                                                                                                                                                                                                                                                                                                                                                                                                                                                                                                                                                                                                                                                                                                                                                                                                                        | 1.11202  | 0.00000  |         |          |    |          |         |          |    |          |         |          |    |          |         |          |    |          |          |          |    |          |          |          |    |          |         |          |    |          |          |          |    |          |          |          |     |          |          |          |     |          |          |          |     |          |          |          |
| 6O  | -1.18053                                                                                                                                                                                                                                                                                                                                                                                                                                                                                                                                                                                                                                                                                                                                                                                                                                                                                                                                                                                                                                                                       | 0.22687  | 0.00000  |         |          |    |          |         |          |    |          |         |          |    |          |         |          |    |          |          |          |    |          |          |          |    |          |         |          |    |          |          |          |    |          |          |          |     |          |          |          |     |          |          |          |     |          |          |          |
| 7O  | 0.09641                                                                                                                                                                                                                                                                                                                                                                                                                                                                                                                                                                                                                                                                                                                                                                                                                                                                                                                                                                                                                                                                        | 2.57394  | 0.00000  |         |          |    |          |         |          |    |          |         |          |    |          |         |          |    |          |          |          |    |          |          |          |    |          |         |          |    |          |          |          |    |          |          |          |     |          |          |          |     |          |          |          |     |          |          |          |
| 8H  | -1.02405                                                                                                                                                                                                                                                                                                                                                                                                                                                                                                                                                                                                                                                                                                                                                                                                                                                                                                                                                                                                                                                                       | -1.56478 | 0.00000  |         |          |    |          |         |          |    |          |         |          |    |          |         |          |    |          |          |          |    |          |          |          |    |          |         |          |    |          |          |          |    |          |          |          |     |          |          |          |     |          |          |          |     |          |          |          |
| 9C  | -0.11246                                                                                                                                                                                                                                                                                                                                                                                                                                                                                                                                                                                                                                                                                                                                                                                                                                                                                                                                                                                                                                                                       | -3.55796 | 0.00000  |         |          |    |          |         |          |    |          |         |          |    |          |         |          |    |          |          |          |    |          |          |          |    |          |         |          |    |          |          |          |    |          |          |          |     |          |          |          |     |          |          |          |     |          |          |          |
| 10N | -0.63837                                                                                                                                                                                                                                                                                                                                                                                                                                                                                                                                                                                                                                                                                                                                                                                                                                                                                                                                                                                                                                                                       | -2.50491 | 0.00000  |         |          |    |          |         |          |    |          |         |          |    |          |         |          |    |          |          |          |    |          |          |          |    |          |         |          |    |          |          |          |    |          |          |          |     |          |          |          |     |          |          |          |     |          |          |          |
|     | <p>CH<sub>3</sub>PO<sub>2</sub>...HCCH</p> <p><math>E_{\text{CCSD(T)}} = -608.279665</math>    <math>E_{\text{ZPVE}} = 0.073228</math></p> <table border="1"> <tbody> <tr><td>1C</td><td>-0.30078</td><td>1.41786</td><td>0.39946</td></tr> <tr><td>2H</td><td>-0.81417</td><td>2.25708</td><td>-0.05726</td></tr> <tr><td>3H</td><td>0.72606</td><td>1.32142</td><td>0.0501</td></tr> <tr><td>4H</td><td>-0.28373</td><td>1.5231</td><td>1.4837</td></tr> <tr><td>5P</td><td>-1.17354</td><td>-0.10829</td><td>0.01635</td></tr> <tr><td>6O</td><td>-2.50608</td><td>0.0678</td><td>-0.59583</td></tr> <tr><td>7O</td><td>-0.42328</td><td>-1.3287</td><td>0.38802</td></tr> <tr><td>8C</td><td>2.64141</td><td>-0.52292</td><td>-0.03527</td></tr> <tr><td>9H</td><td>1.83782</td><td>-1.181</td><td>0.20679</td></tr> <tr><td>10C</td><td>3.53367</td><td>0.2511</td><td>-0.31517</td></tr> <tr><td>11H</td><td>4.32618</td><td>0.9147</td><td>-0.56023</td></tr> </tbody> </table>                                                                                         | 1C       | -0.30078 | 1.41786 | 0.39946  | 2H | -0.81417 | 2.25708 | -0.05726 | 3H | 0.72606  | 1.32142 | 0.0501   | 4H | -0.28373 | 1.5231  | 1.4837   | 5P | -1.17354 | -0.10829 | 0.01635  | 6O | -2.50608 | 0.0678   | -0.59583 | 7O | -0.42328 | -1.3287 | 0.38802  | 8C | 2.64141  | -0.52292 | -0.03527 | 9H | 1.83782  | -1.181   | 0.20679  | 10C | 3.53367  | 0.2511   | -0.31517 | 11H | 4.32618  | 0.9147   | -0.56023 |     |          |          |          |
| 1C  | -0.30078                                                                                                                                                                                                                                                                                                                                                                                                                                                                                                                                                                                                                                                                                                                                                                                                                                                                                                                                                                                                                                                                       | 1.41786  | 0.39946  |         |          |    |          |         |          |    |          |         |          |    |          |         |          |    |          |          |          |    |          |          |          |    |          |         |          |    |          |          |          |    |          |          |          |     |          |          |          |     |          |          |          |     |          |          |          |
| 2H  | -0.81417                                                                                                                                                                                                                                                                                                                                                                                                                                                                                                                                                                                                                                                                                                                                                                                                                                                                                                                                                                                                                                                                       | 2.25708  | -0.05726 |         |          |    |          |         |          |    |          |         |          |    |          |         |          |    |          |          |          |    |          |          |          |    |          |         |          |    |          |          |          |    |          |          |          |     |          |          |          |     |          |          |          |     |          |          |          |
| 3H  | 0.72606                                                                                                                                                                                                                                                                                                                                                                                                                                                                                                                                                                                                                                                                                                                                                                                                                                                                                                                                                                                                                                                                        | 1.32142  | 0.0501   |         |          |    |          |         |          |    |          |         |          |    |          |         |          |    |          |          |          |    |          |          |          |    |          |         |          |    |          |          |          |    |          |          |          |     |          |          |          |     |          |          |          |     |          |          |          |
| 4H  | -0.28373                                                                                                                                                                                                                                                                                                                                                                                                                                                                                                                                                                                                                                                                                                                                                                                                                                                                                                                                                                                                                                                                       | 1.5231   | 1.4837   |         |          |    |          |         |          |    |          |         |          |    |          |         |          |    |          |          |          |    |          |          |          |    |          |         |          |    |          |          |          |    |          |          |          |     |          |          |          |     |          |          |          |     |          |          |          |
| 5P  | -1.17354                                                                                                                                                                                                                                                                                                                                                                                                                                                                                                                                                                                                                                                                                                                                                                                                                                                                                                                                                                                                                                                                       | -0.10829 | 0.01635  |         |          |    |          |         |          |    |          |         |          |    |          |         |          |    |          |          |          |    |          |          |          |    |          |         |          |    |          |          |          |    |          |          |          |     |          |          |          |     |          |          |          |     |          |          |          |
| 6O  | -2.50608                                                                                                                                                                                                                                                                                                                                                                                                                                                                                                                                                                                                                                                                                                                                                                                                                                                                                                                                                                                                                                                                       | 0.0678   | -0.59583 |         |          |    |          |         |          |    |          |         |          |    |          |         |          |    |          |          |          |    |          |          |          |    |          |         |          |    |          |          |          |    |          |          |          |     |          |          |          |     |          |          |          |     |          |          |          |
| 7O  | -0.42328                                                                                                                                                                                                                                                                                                                                                                                                                                                                                                                                                                                                                                                                                                                                                                                                                                                                                                                                                                                                                                                                       | -1.3287  | 0.38802  |         |          |    |          |         |          |    |          |         |          |    |          |         |          |    |          |          |          |    |          |          |          |    |          |         |          |    |          |          |          |    |          |          |          |     |          |          |          |     |          |          |          |     |          |          |          |
| 8C  | 2.64141                                                                                                                                                                                                                                                                                                                                                                                                                                                                                                                                                                                                                                                                                                                                                                                                                                                                                                                                                                                                                                                                        | -0.52292 | -0.03527 |         |          |    |          |         |          |    |          |         |          |    |          |         |          |    |          |          |          |    |          |          |          |    |          |         |          |    |          |          |          |    |          |          |          |     |          |          |          |     |          |          |          |     |          |          |          |
| 9H  | 1.83782                                                                                                                                                                                                                                                                                                                                                                                                                                                                                                                                                                                                                                                                                                                                                                                                                                                                                                                                                                                                                                                                        | -1.181   | 0.20679  |         |          |    |          |         |          |    |          |         |          |    |          |         |          |    |          |          |          |    |          |          |          |    |          |         |          |    |          |          |          |    |          |          |          |     |          |          |          |     |          |          |          |     |          |          |          |
| 10C | 3.53367                                                                                                                                                                                                                                                                                                                                                                                                                                                                                                                                                                                                                                                                                                                                                                                                                                                                                                                                                                                                                                                                        | 0.2511   | -0.31517 |         |          |    |          |         |          |    |          |         |          |    |          |         |          |    |          |          |          |    |          |          |          |    |          |         |          |    |          |          |          |    |          |          |          |     |          |          |          |     |          |          |          |     |          |          |          |
| 11H | 4.32618                                                                                                                                                                                                                                                                                                                                                                                                                                                                                                                                                                                                                                                                                                                                                                                                                                                                                                                                                                                                                                                                        | 0.9147   | -0.56023 |         |          |    |          |         |          |    |          |         |          |    |          |         |          |    |          |          |          |    |          |          |          |    |          |         |          |    |          |          |          |    |          |          |          |     |          |          |          |     |          |          |          |     |          |          |          |

|     |                                                                                                                                                                                                                                                                                                                                                                                                                                                                                                                                                                                                                                                                                                                                                                                                                                                                                                                                                                                                     |          |          |          |         |    |          |          |         |    |          |          |         |    |          |          |         |    |          |          |         |    |          |          |          |    |         |          |         |    |          |          |         |    |          |          |         |     |          |          |         |     |          |         |          |
|-----|-----------------------------------------------------------------------------------------------------------------------------------------------------------------------------------------------------------------------------------------------------------------------------------------------------------------------------------------------------------------------------------------------------------------------------------------------------------------------------------------------------------------------------------------------------------------------------------------------------------------------------------------------------------------------------------------------------------------------------------------------------------------------------------------------------------------------------------------------------------------------------------------------------------------------------------------------------------------------------------------------------|----------|----------|----------|---------|----|----------|----------|---------|----|----------|----------|---------|----|----------|----------|---------|----|----------|----------|---------|----|----------|----------|----------|----|---------|----------|---------|----|----------|----------|---------|----|----------|----------|---------|-----|----------|----------|---------|-----|----------|---------|----------|
|     | <p><i>trans</i>-CH<sub>3</sub>OPO...H<sub>2</sub>O<br/> <math>E_{\text{CCSD(T)}} = -607.410305</math>    <math>E_{\text{ZPVE}} = 0.070297</math></p> <table border="1"> <tbody> <tr><td>1P</td><td>1.10233</td><td>-0.08196</td><td>0.00000</td></tr> <tr><td>2O</td><td>0.00000</td><td>1.08753</td><td>0.00000</td></tr> <tr><td>3C</td><td>0.43617</td><td>2.4632</td><td>0.00000</td></tr> <tr><td>4H</td><td>0.03535</td><td>2.93719</td><td>0.8901</td></tr> <tr><td>5H</td><td>1.52434</td><td>2.53313</td><td>0.00000</td></tr> <tr><td>6H</td><td>0.03535</td><td>2.93719</td><td>-0.8901</td></tr> <tr><td>7O</td><td>0.41136</td><td>-1.39182</td><td>0.00000</td></tr> <tr><td>8O</td><td>-2.48798</td><td>-1.86859</td><td>0.00000</td></tr> <tr><td>9H</td><td>-1.52666</td><td>-1.75256</td><td>0.00000</td></tr> <tr><td>10H</td><td>-2.60738</td><td>-2.82167</td><td>0.00000</td></tr> </tbody> </table>                                                                          | 1P       | 1.10233  | -0.08196 | 0.00000 | 2O | 0.00000  | 1.08753  | 0.00000 | 3C | 0.43617  | 2.4632   | 0.00000 | 4H | 0.03535  | 2.93719  | 0.8901  | 5H | 1.52434  | 2.53313  | 0.00000 | 6H | 0.03535  | 2.93719  | -0.8901  | 7O | 0.41136 | -1.39182 | 0.00000 | 8O | -2.48798 | -1.86859 | 0.00000 | 9H | -1.52666 | -1.75256 | 0.00000 | 10H | -2.60738 | -2.82167 | 0.00000 |     |          |         |          |
| 1P  | 1.10233                                                                                                                                                                                                                                                                                                                                                                                                                                                                                                                                                                                                                                                                                                                                                                                                                                                                                                                                                                                             | -0.08196 | 0.00000  |          |         |    |          |          |         |    |          |          |         |    |          |          |         |    |          |          |         |    |          |          |          |    |         |          |         |    |          |          |         |    |          |          |         |     |          |          |         |     |          |         |          |
| 2O  | 0.00000                                                                                                                                                                                                                                                                                                                                                                                                                                                                                                                                                                                                                                                                                                                                                                                                                                                                                                                                                                                             | 1.08753  | 0.00000  |          |         |    |          |          |         |    |          |          |         |    |          |          |         |    |          |          |         |    |          |          |          |    |         |          |         |    |          |          |         |    |          |          |         |     |          |          |         |     |          |         |          |
| 3C  | 0.43617                                                                                                                                                                                                                                                                                                                                                                                                                                                                                                                                                                                                                                                                                                                                                                                                                                                                                                                                                                                             | 2.4632   | 0.00000  |          |         |    |          |          |         |    |          |          |         |    |          |          |         |    |          |          |         |    |          |          |          |    |         |          |         |    |          |          |         |    |          |          |         |     |          |          |         |     |          |         |          |
| 4H  | 0.03535                                                                                                                                                                                                                                                                                                                                                                                                                                                                                                                                                                                                                                                                                                                                                                                                                                                                                                                                                                                             | 2.93719  | 0.8901   |          |         |    |          |          |         |    |          |          |         |    |          |          |         |    |          |          |         |    |          |          |          |    |         |          |         |    |          |          |         |    |          |          |         |     |          |          |         |     |          |         |          |
| 5H  | 1.52434                                                                                                                                                                                                                                                                                                                                                                                                                                                                                                                                                                                                                                                                                                                                                                                                                                                                                                                                                                                             | 2.53313  | 0.00000  |          |         |    |          |          |         |    |          |          |         |    |          |          |         |    |          |          |         |    |          |          |          |    |         |          |         |    |          |          |         |    |          |          |         |     |          |          |         |     |          |         |          |
| 6H  | 0.03535                                                                                                                                                                                                                                                                                                                                                                                                                                                                                                                                                                                                                                                                                                                                                                                                                                                                                                                                                                                             | 2.93719  | -0.8901  |          |         |    |          |          |         |    |          |          |         |    |          |          |         |    |          |          |         |    |          |          |          |    |         |          |         |    |          |          |         |    |          |          |         |     |          |          |         |     |          |         |          |
| 7O  | 0.41136                                                                                                                                                                                                                                                                                                                                                                                                                                                                                                                                                                                                                                                                                                                                                                                                                                                                                                                                                                                             | -1.39182 | 0.00000  |          |         |    |          |          |         |    |          |          |         |    |          |          |         |    |          |          |         |    |          |          |          |    |         |          |         |    |          |          |         |    |          |          |         |     |          |          |         |     |          |         |          |
| 8O  | -2.48798                                                                                                                                                                                                                                                                                                                                                                                                                                                                                                                                                                                                                                                                                                                                                                                                                                                                                                                                                                                            | -1.86859 | 0.00000  |          |         |    |          |          |         |    |          |          |         |    |          |          |         |    |          |          |         |    |          |          |          |    |         |          |         |    |          |          |         |    |          |          |         |     |          |          |         |     |          |         |          |
| 9H  | -1.52666                                                                                                                                                                                                                                                                                                                                                                                                                                                                                                                                                                                                                                                                                                                                                                                                                                                                                                                                                                                            | -1.75256 | 0.00000  |          |         |    |          |          |         |    |          |          |         |    |          |          |         |    |          |          |         |    |          |          |          |    |         |          |         |    |          |          |         |    |          |          |         |     |          |          |         |     |          |         |          |
| 10H | -2.60738                                                                                                                                                                                                                                                                                                                                                                                                                                                                                                                                                                                                                                                                                                                                                                                                                                                                                                                                                                                            | -2.82167 | 0.00000  |          |         |    |          |          |         |    |          |          |         |    |          |          |         |    |          |          |         |    |          |          |          |    |         |          |         |    |          |          |         |    |          |          |         |     |          |          |         |     |          |         |          |
|     | <p><i>trans</i>-CH<sub>3</sub>OPO...HNC<br/> <math>E_{\text{CCSD(T)}} = -624.331761</math>    <math>E_{\text{ZPVE}} = 0.063994</math></p> <table border="1"> <tbody> <tr><td>1P</td><td>-1.27402</td><td>0.46684</td><td>0.00000</td></tr> <tr><td>2O</td><td>-0.90556</td><td>-1.1038</td><td>0.00000</td></tr> <tr><td>3C</td><td>-1.97722</td><td>-2.07416</td><td>0.00000</td></tr> <tr><td>4H</td><td>-1.86865</td><td>-2.68448</td><td>0.89046</td></tr> <tr><td>5H</td><td>-2.95195</td><td>-1.58584</td><td>0.00000</td></tr> <tr><td>6H</td><td>-1.86865</td><td>-2.68448</td><td>-0.89046</td></tr> <tr><td>7O</td><td>0.00000</td><td>1.24071</td><td>0.00000</td></tr> <tr><td>8H</td><td>1.77488</td><td>1.01387</td><td>0.00000</td></tr> <tr><td>9N</td><td>2.78121</td><td>0.87342</td><td>0.00000</td></tr> <tr><td>10C</td><td>3.94401</td><td>0.69567</td><td>0.00000</td></tr> </tbody> </table>                                                                                | 1P       | -1.27402 | 0.46684  | 0.00000 | 2O | -0.90556 | -1.1038  | 0.00000 | 3C | -1.97722 | -2.07416 | 0.00000 | 4H | -1.86865 | -2.68448 | 0.89046 | 5H | -2.95195 | -1.58584 | 0.00000 | 6H | -1.86865 | -2.68448 | -0.89046 | 7O | 0.00000 | 1.24071  | 0.00000 | 8H | 1.77488  | 1.01387  | 0.00000 | 9N | 2.78121  | 0.87342  | 0.00000 | 10C | 3.94401  | 0.69567  | 0.00000 |     |          |         |          |
| 1P  | -1.27402                                                                                                                                                                                                                                                                                                                                                                                                                                                                                                                                                                                                                                                                                                                                                                                                                                                                                                                                                                                            | 0.46684  | 0.00000  |          |         |    |          |          |         |    |          |          |         |    |          |          |         |    |          |          |         |    |          |          |          |    |         |          |         |    |          |          |         |    |          |          |         |     |          |          |         |     |          |         |          |
| 2O  | -0.90556                                                                                                                                                                                                                                                                                                                                                                                                                                                                                                                                                                                                                                                                                                                                                                                                                                                                                                                                                                                            | -1.1038  | 0.00000  |          |         |    |          |          |         |    |          |          |         |    |          |          |         |    |          |          |         |    |          |          |          |    |         |          |         |    |          |          |         |    |          |          |         |     |          |          |         |     |          |         |          |
| 3C  | -1.97722                                                                                                                                                                                                                                                                                                                                                                                                                                                                                                                                                                                                                                                                                                                                                                                                                                                                                                                                                                                            | -2.07416 | 0.00000  |          |         |    |          |          |         |    |          |          |         |    |          |          |         |    |          |          |         |    |          |          |          |    |         |          |         |    |          |          |         |    |          |          |         |     |          |          |         |     |          |         |          |
| 4H  | -1.86865                                                                                                                                                                                                                                                                                                                                                                                                                                                                                                                                                                                                                                                                                                                                                                                                                                                                                                                                                                                            | -2.68448 | 0.89046  |          |         |    |          |          |         |    |          |          |         |    |          |          |         |    |          |          |         |    |          |          |          |    |         |          |         |    |          |          |         |    |          |          |         |     |          |          |         |     |          |         |          |
| 5H  | -2.95195                                                                                                                                                                                                                                                                                                                                                                                                                                                                                                                                                                                                                                                                                                                                                                                                                                                                                                                                                                                            | -1.58584 | 0.00000  |          |         |    |          |          |         |    |          |          |         |    |          |          |         |    |          |          |         |    |          |          |          |    |         |          |         |    |          |          |         |    |          |          |         |     |          |          |         |     |          |         |          |
| 6H  | -1.86865                                                                                                                                                                                                                                                                                                                                                                                                                                                                                                                                                                                                                                                                                                                                                                                                                                                                                                                                                                                            | -2.68448 | -0.89046 |          |         |    |          |          |         |    |          |          |         |    |          |          |         |    |          |          |         |    |          |          |          |    |         |          |         |    |          |          |         |    |          |          |         |     |          |          |         |     |          |         |          |
| 7O  | 0.00000                                                                                                                                                                                                                                                                                                                                                                                                                                                                                                                                                                                                                                                                                                                                                                                                                                                                                                                                                                                             | 1.24071  | 0.00000  |          |         |    |          |          |         |    |          |          |         |    |          |          |         |    |          |          |         |    |          |          |          |    |         |          |         |    |          |          |         |    |          |          |         |     |          |          |         |     |          |         |          |
| 8H  | 1.77488                                                                                                                                                                                                                                                                                                                                                                                                                                                                                                                                                                                                                                                                                                                                                                                                                                                                                                                                                                                             | 1.01387  | 0.00000  |          |         |    |          |          |         |    |          |          |         |    |          |          |         |    |          |          |         |    |          |          |          |    |         |          |         |    |          |          |         |    |          |          |         |     |          |          |         |     |          |         |          |
| 9N  | 2.78121                                                                                                                                                                                                                                                                                                                                                                                                                                                                                                                                                                                                                                                                                                                                                                                                                                                                                                                                                                                             | 0.87342  | 0.00000  |          |         |    |          |          |         |    |          |          |         |    |          |          |         |    |          |          |         |    |          |          |          |    |         |          |         |    |          |          |         |    |          |          |         |     |          |          |         |     |          |         |          |
| 10C | 3.94401                                                                                                                                                                                                                                                                                                                                                                                                                                                                                                                                                                                                                                                                                                                                                                                                                                                                                                                                                                                             | 0.69567  | 0.00000  |          |         |    |          |          |         |    |          |          |         |    |          |          |         |    |          |          |         |    |          |          |          |    |         |          |         |    |          |          |         |    |          |          |         |     |          |          |         |     |          |         |          |
|     | <p><i>trans</i>-CH<sub>3</sub>OPO...HCCH<br/> <math>E_{\text{CCSD(T)}} = -608.257586</math>    <math>E_{\text{ZPVE}} = 0.074176</math></p> <table border="1"> <tbody> <tr><td>1P</td><td>-1.35627</td><td>0.57309</td><td>0.00000</td></tr> <tr><td>2O</td><td>-1.23257</td><td>-1.03409</td><td>0.00000</td></tr> <tr><td>3C</td><td>-2.44163</td><td>-1.82123</td><td>0.00000</td></tr> <tr><td>4H</td><td>-2.43437</td><td>-2.44228</td><td>0.89007</td></tr> <tr><td>5H</td><td>-3.32772</td><td>-1.18558</td><td>0.00000</td></tr> <tr><td>6H</td><td>-2.43437</td><td>-2.44228</td><td>-0.89007</td></tr> <tr><td>7O</td><td>0.00000</td><td>1.163</td><td>0.00000</td></tr> <tr><td>8C</td><td>3.19224</td><td>0.63229</td><td>0.00000</td></tr> <tr><td>9H</td><td>2.14127</td><td>0.81742</td><td>0.00000</td></tr> <tr><td>10C</td><td>4.38717</td><td>0.42037</td><td>0.00000</td></tr> <tr><td>11H</td><td>5.43305</td><td>0.23642</td><td>0.00000</td></tr> </tbody> </table>          | 1P       | -1.35627 | 0.57309  | 0.00000 | 2O | -1.23257 | -1.03409 | 0.00000 | 3C | -2.44163 | -1.82123 | 0.00000 | 4H | -2.43437 | -2.44228 | 0.89007 | 5H | -3.32772 | -1.18558 | 0.00000 | 6H | -2.43437 | -2.44228 | -0.89007 | 7O | 0.00000 | 1.163    | 0.00000 | 8C | 3.19224  | 0.63229  | 0.00000 | 9H | 2.14127  | 0.81742  | 0.00000 | 10C | 4.38717  | 0.42037  | 0.00000 | 11H | 5.43305  | 0.23642 | 0.00000  |
| 1P  | -1.35627                                                                                                                                                                                                                                                                                                                                                                                                                                                                                                                                                                                                                                                                                                                                                                                                                                                                                                                                                                                            | 0.57309  | 0.00000  |          |         |    |          |          |         |    |          |          |         |    |          |          |         |    |          |          |         |    |          |          |          |    |         |          |         |    |          |          |         |    |          |          |         |     |          |          |         |     |          |         |          |
| 2O  | -1.23257                                                                                                                                                                                                                                                                                                                                                                                                                                                                                                                                                                                                                                                                                                                                                                                                                                                                                                                                                                                            | -1.03409 | 0.00000  |          |         |    |          |          |         |    |          |          |         |    |          |          |         |    |          |          |         |    |          |          |          |    |         |          |         |    |          |          |         |    |          |          |         |     |          |          |         |     |          |         |          |
| 3C  | -2.44163                                                                                                                                                                                                                                                                                                                                                                                                                                                                                                                                                                                                                                                                                                                                                                                                                                                                                                                                                                                            | -1.82123 | 0.00000  |          |         |    |          |          |         |    |          |          |         |    |          |          |         |    |          |          |         |    |          |          |          |    |         |          |         |    |          |          |         |    |          |          |         |     |          |          |         |     |          |         |          |
| 4H  | -2.43437                                                                                                                                                                                                                                                                                                                                                                                                                                                                                                                                                                                                                                                                                                                                                                                                                                                                                                                                                                                            | -2.44228 | 0.89007  |          |         |    |          |          |         |    |          |          |         |    |          |          |         |    |          |          |         |    |          |          |          |    |         |          |         |    |          |          |         |    |          |          |         |     |          |          |         |     |          |         |          |
| 5H  | -3.32772                                                                                                                                                                                                                                                                                                                                                                                                                                                                                                                                                                                                                                                                                                                                                                                                                                                                                                                                                                                            | -1.18558 | 0.00000  |          |         |    |          |          |         |    |          |          |         |    |          |          |         |    |          |          |         |    |          |          |          |    |         |          |         |    |          |          |         |    |          |          |         |     |          |          |         |     |          |         |          |
| 6H  | -2.43437                                                                                                                                                                                                                                                                                                                                                                                                                                                                                                                                                                                                                                                                                                                                                                                                                                                                                                                                                                                            | -2.44228 | -0.89007 |          |         |    |          |          |         |    |          |          |         |    |          |          |         |    |          |          |         |    |          |          |          |    |         |          |         |    |          |          |         |    |          |          |         |     |          |          |         |     |          |         |          |
| 7O  | 0.00000                                                                                                                                                                                                                                                                                                                                                                                                                                                                                                                                                                                                                                                                                                                                                                                                                                                                                                                                                                                             | 1.163    | 0.00000  |          |         |    |          |          |         |    |          |          |         |    |          |          |         |    |          |          |         |    |          |          |          |    |         |          |         |    |          |          |         |    |          |          |         |     |          |          |         |     |          |         |          |
| 8C  | 3.19224                                                                                                                                                                                                                                                                                                                                                                                                                                                                                                                                                                                                                                                                                                                                                                                                                                                                                                                                                                                             | 0.63229  | 0.00000  |          |         |    |          |          |         |    |          |          |         |    |          |          |         |    |          |          |         |    |          |          |          |    |         |          |         |    |          |          |         |    |          |          |         |     |          |          |         |     |          |         |          |
| 9H  | 2.14127                                                                                                                                                                                                                                                                                                                                                                                                                                                                                                                                                                                                                                                                                                                                                                                                                                                                                                                                                                                             | 0.81742  | 0.00000  |          |         |    |          |          |         |    |          |          |         |    |          |          |         |    |          |          |         |    |          |          |          |    |         |          |         |    |          |          |         |    |          |          |         |     |          |          |         |     |          |         |          |
| 10C | 4.38717                                                                                                                                                                                                                                                                                                                                                                                                                                                                                                                                                                                                                                                                                                                                                                                                                                                                                                                                                                                             | 0.42037  | 0.00000  |          |         |    |          |          |         |    |          |          |         |    |          |          |         |    |          |          |         |    |          |          |          |    |         |          |         |    |          |          |         |    |          |          |         |     |          |          |         |     |          |         |          |
| 11H | 5.43305                                                                                                                                                                                                                                                                                                                                                                                                                                                                                                                                                                                                                                                                                                                                                                                                                                                                                                                                                                                             | 0.23642  | 0.00000  |          |         |    |          |          |         |    |          |          |         |    |          |          |         |    |          |          |         |    |          |          |          |    |         |          |         |    |          |          |         |    |          |          |         |     |          |          |         |     |          |         |          |
|     | <p><i>cis</i>-CH<sub>3</sub>OPO...H<sub>3</sub>N<br/> <math>E_{\text{CCSD(T)}} = -587.550473</math>    <math>E_{\text{ZPVE}} = 0.082735</math></p> <table border="1"> <tbody> <tr><td>1P</td><td>1.37473</td><td>0.57019</td><td>0.00000</td></tr> <tr><td>2O</td><td>1.33678</td><td>-1.04419</td><td>0.00000</td></tr> <tr><td>3C</td><td>0.10942</td><td>-1.80989</td><td>0.00000</td></tr> <tr><td>4H</td><td>0.11358</td><td>-2.43188</td><td>0.88978</td></tr> <tr><td>5H</td><td>-0.75258</td><td>-1.14729</td><td>0.00000</td></tr> <tr><td>6H</td><td>0.11358</td><td>-2.43188</td><td>-0.88978</td></tr> <tr><td>7O</td><td>0.00000</td><td>1.15507</td><td>0.00000</td></tr> <tr><td>8N</td><td>-3.2025</td><td>0.83786</td><td>0.00000</td></tr> <tr><td>9H</td><td>-3.41256</td><td>0.27511</td><td>0.81404</td></tr> <tr><td>10H</td><td>-2.20357</td><td>1.01531</td><td>0.00000</td></tr> <tr><td>11H</td><td>-3.41256</td><td>0.27511</td><td>-0.81404</td></tr> </tbody> </table> | 1P       | 1.37473  | 0.57019  | 0.00000 | 2O | 1.33678  | -1.04419 | 0.00000 | 3C | 0.10942  | -1.80989 | 0.00000 | 4H | 0.11358  | -2.43188 | 0.88978 | 5H | -0.75258 | -1.14729 | 0.00000 | 6H | 0.11358  | -2.43188 | -0.88978 | 7O | 0.00000 | 1.15507  | 0.00000 | 8N | -3.2025  | 0.83786  | 0.00000 | 9H | -3.41256 | 0.27511  | 0.81404 | 10H | -2.20357 | 1.01531  | 0.00000 | 11H | -3.41256 | 0.27511 | -0.81404 |
| 1P  | 1.37473                                                                                                                                                                                                                                                                                                                                                                                                                                                                                                                                                                                                                                                                                                                                                                                                                                                                                                                                                                                             | 0.57019  | 0.00000  |          |         |    |          |          |         |    |          |          |         |    |          |          |         |    |          |          |         |    |          |          |          |    |         |          |         |    |          |          |         |    |          |          |         |     |          |          |         |     |          |         |          |
| 2O  | 1.33678                                                                                                                                                                                                                                                                                                                                                                                                                                                                                                                                                                                                                                                                                                                                                                                                                                                                                                                                                                                             | -1.04419 | 0.00000  |          |         |    |          |          |         |    |          |          |         |    |          |          |         |    |          |          |         |    |          |          |          |    |         |          |         |    |          |          |         |    |          |          |         |     |          |          |         |     |          |         |          |
| 3C  | 0.10942                                                                                                                                                                                                                                                                                                                                                                                                                                                                                                                                                                                                                                                                                                                                                                                                                                                                                                                                                                                             | -1.80989 | 0.00000  |          |         |    |          |          |         |    |          |          |         |    |          |          |         |    |          |          |         |    |          |          |          |    |         |          |         |    |          |          |         |    |          |          |         |     |          |          |         |     |          |         |          |
| 4H  | 0.11358                                                                                                                                                                                                                                                                                                                                                                                                                                                                                                                                                                                                                                                                                                                                                                                                                                                                                                                                                                                             | -2.43188 | 0.88978  |          |         |    |          |          |         |    |          |          |         |    |          |          |         |    |          |          |         |    |          |          |          |    |         |          |         |    |          |          |         |    |          |          |         |     |          |          |         |     |          |         |          |
| 5H  | -0.75258                                                                                                                                                                                                                                                                                                                                                                                                                                                                                                                                                                                                                                                                                                                                                                                                                                                                                                                                                                                            | -1.14729 | 0.00000  |          |         |    |          |          |         |    |          |          |         |    |          |          |         |    |          |          |         |    |          |          |          |    |         |          |         |    |          |          |         |    |          |          |         |     |          |          |         |     |          |         |          |
| 6H  | 0.11358                                                                                                                                                                                                                                                                                                                                                                                                                                                                                                                                                                                                                                                                                                                                                                                                                                                                                                                                                                                             | -2.43188 | -0.88978 |          |         |    |          |          |         |    |          |          |         |    |          |          |         |    |          |          |         |    |          |          |          |    |         |          |         |    |          |          |         |    |          |          |         |     |          |          |         |     |          |         |          |
| 7O  | 0.00000                                                                                                                                                                                                                                                                                                                                                                                                                                                                                                                                                                                                                                                                                                                                                                                                                                                                                                                                                                                             | 1.15507  | 0.00000  |          |         |    |          |          |         |    |          |          |         |    |          |          |         |    |          |          |         |    |          |          |          |    |         |          |         |    |          |          |         |    |          |          |         |     |          |          |         |     |          |         |          |
| 8N  | -3.2025                                                                                                                                                                                                                                                                                                                                                                                                                                                                                                                                                                                                                                                                                                                                                                                                                                                                                                                                                                                             | 0.83786  | 0.00000  |          |         |    |          |          |         |    |          |          |         |    |          |          |         |    |          |          |         |    |          |          |          |    |         |          |         |    |          |          |         |    |          |          |         |     |          |          |         |     |          |         |          |
| 9H  | -3.41256                                                                                                                                                                                                                                                                                                                                                                                                                                                                                                                                                                                                                                                                                                                                                                                                                                                                                                                                                                                            | 0.27511  | 0.81404  |          |         |    |          |          |         |    |          |          |         |    |          |          |         |    |          |          |         |    |          |          |          |    |         |          |         |    |          |          |         |    |          |          |         |     |          |          |         |     |          |         |          |
| 10H | -2.20357                                                                                                                                                                                                                                                                                                                                                                                                                                                                                                                                                                                                                                                                                                                                                                                                                                                                                                                                                                                            | 1.01531  | 0.00000  |          |         |    |          |          |         |    |          |          |         |    |          |          |         |    |          |          |         |    |          |          |          |    |         |          |         |    |          |          |         |    |          |          |         |     |          |          |         |     |          |         |          |
| 11H | -3.41256                                                                                                                                                                                                                                                                                                                                                                                                                                                                                                                                                                                                                                                                                                                                                                                                                                                                                                                                                                                            | 0.27511  | -0.81404 |          |         |    |          |          |         |    |          |          |         |    |          |          |         |    |          |          |         |    |          |          |          |    |         |          |         |    |          |          |         |    |          |          |         |     |          |          |         |     |          |         |          |

|     |                                                                                                                                                                                                                                                                                                                                                                                                                                                                                                                                                                                                                                                                                                                                                                                                                                                                                                                                                                                            |          |          |         |         |    |         |          |         |    |          |          |         |    |          |          |         |    |          |          |          |    |         |          |         |    |         |         |         |    |          |         |         |    |          |         |         |     |          |          |         |     |          |          |         |
|-----|--------------------------------------------------------------------------------------------------------------------------------------------------------------------------------------------------------------------------------------------------------------------------------------------------------------------------------------------------------------------------------------------------------------------------------------------------------------------------------------------------------------------------------------------------------------------------------------------------------------------------------------------------------------------------------------------------------------------------------------------------------------------------------------------------------------------------------------------------------------------------------------------------------------------------------------------------------------------------------------------|----------|----------|---------|---------|----|---------|----------|---------|----|----------|----------|---------|----|----------|----------|---------|----|----------|----------|----------|----|---------|----------|---------|----|---------|---------|---------|----|----------|---------|---------|----|----------|---------|---------|-----|----------|----------|---------|-----|----------|----------|---------|
|     | <p><i>cis</i>-CH<sub>3</sub>OPO...H<sub>2</sub>O<br/> <math>E_{\text{CCSD(T)}} = -607.418987</math>    <math>E_{\text{ZPVE}} = 0.070878</math></p> <table border="1"> <tbody> <tr><td>1P</td><td>1.31605</td><td>0.59383</td><td>0.00000</td></tr> <tr><td>2O</td><td>1.14809</td><td>-0.99288</td><td>0.00000</td></tr> <tr><td>3C</td><td>-0.15224</td><td>-1.64612</td><td>0.00000</td></tr> <tr><td>4H</td><td>-0.71028</td><td>-1.35592</td><td>0.88466</td></tr> <tr><td>5H</td><td>-0.71028</td><td>-1.35592</td><td>-0.88466</td></tr> <tr><td>6H</td><td>0.05148</td><td>-2.71034</td><td>0.00000</td></tr> <tr><td>7O</td><td>0.00000</td><td>1.29035</td><td>0.00000</td></tr> <tr><td>8O</td><td>-2.67922</td><td>0.28408</td><td>0.00000</td></tr> <tr><td>9H</td><td>-3.36346</td><td>0.95836</td><td>0.00000</td></tr> <tr><td>10H</td><td>-1.84572</td><td>0.7808</td><td>0.00000</td></tr> </tbody> </table>                                                              | 1P       | 1.31605  | 0.59383 | 0.00000 | 2O | 1.14809 | -0.99288 | 0.00000 | 3C | -0.15224 | -1.64612 | 0.00000 | 4H | -0.71028 | -1.35592 | 0.88466 | 5H | -0.71028 | -1.35592 | -0.88466 | 6H | 0.05148 | -2.71034 | 0.00000 | 7O | 0.00000 | 1.29035 | 0.00000 | 8O | -2.67922 | 0.28408 | 0.00000 | 9H | -3.36346 | 0.95836 | 0.00000 | 10H | -1.84572 | 0.7808   | 0.00000 |     |          |          |         |
| 1P  | 1.31605                                                                                                                                                                                                                                                                                                                                                                                                                                                                                                                                                                                                                                                                                                                                                                                                                                                                                                                                                                                    | 0.59383  | 0.00000  |         |         |    |         |          |         |    |          |          |         |    |          |          |         |    |          |          |          |    |         |          |         |    |         |         |         |    |          |         |         |    |          |         |         |     |          |          |         |     |          |          |         |
| 2O  | 1.14809                                                                                                                                                                                                                                                                                                                                                                                                                                                                                                                                                                                                                                                                                                                                                                                                                                                                                                                                                                                    | -0.99288 | 0.00000  |         |         |    |         |          |         |    |          |          |         |    |          |          |         |    |          |          |          |    |         |          |         |    |         |         |         |    |          |         |         |    |          |         |         |     |          |          |         |     |          |          |         |
| 3C  | -0.15224                                                                                                                                                                                                                                                                                                                                                                                                                                                                                                                                                                                                                                                                                                                                                                                                                                                                                                                                                                                   | -1.64612 | 0.00000  |         |         |    |         |          |         |    |          |          |         |    |          |          |         |    |          |          |          |    |         |          |         |    |         |         |         |    |          |         |         |    |          |         |         |     |          |          |         |     |          |          |         |
| 4H  | -0.71028                                                                                                                                                                                                                                                                                                                                                                                                                                                                                                                                                                                                                                                                                                                                                                                                                                                                                                                                                                                   | -1.35592 | 0.88466  |         |         |    |         |          |         |    |          |          |         |    |          |          |         |    |          |          |          |    |         |          |         |    |         |         |         |    |          |         |         |    |          |         |         |     |          |          |         |     |          |          |         |
| 5H  | -0.71028                                                                                                                                                                                                                                                                                                                                                                                                                                                                                                                                                                                                                                                                                                                                                                                                                                                                                                                                                                                   | -1.35592 | -0.88466 |         |         |    |         |          |         |    |          |          |         |    |          |          |         |    |          |          |          |    |         |          |         |    |         |         |         |    |          |         |         |    |          |         |         |     |          |          |         |     |          |          |         |
| 6H  | 0.05148                                                                                                                                                                                                                                                                                                                                                                                                                                                                                                                                                                                                                                                                                                                                                                                                                                                                                                                                                                                    | -2.71034 | 0.00000  |         |         |    |         |          |         |    |          |          |         |    |          |          |         |    |          |          |          |    |         |          |         |    |         |         |         |    |          |         |         |    |          |         |         |     |          |          |         |     |          |          |         |
| 7O  | 0.00000                                                                                                                                                                                                                                                                                                                                                                                                                                                                                                                                                                                                                                                                                                                                                                                                                                                                                                                                                                                    | 1.29035  | 0.00000  |         |         |    |         |          |         |    |          |          |         |    |          |          |         |    |          |          |          |    |         |          |         |    |         |         |         |    |          |         |         |    |          |         |         |     |          |          |         |     |          |          |         |
| 8O  | -2.67922                                                                                                                                                                                                                                                                                                                                                                                                                                                                                                                                                                                                                                                                                                                                                                                                                                                                                                                                                                                   | 0.28408  | 0.00000  |         |         |    |         |          |         |    |          |          |         |    |          |          |         |    |          |          |          |    |         |          |         |    |         |         |         |    |          |         |         |    |          |         |         |     |          |          |         |     |          |          |         |
| 9H  | -3.36346                                                                                                                                                                                                                                                                                                                                                                                                                                                                                                                                                                                                                                                                                                                                                                                                                                                                                                                                                                                   | 0.95836  | 0.00000  |         |         |    |         |          |         |    |          |          |         |    |          |          |         |    |          |          |          |    |         |          |         |    |         |         |         |    |          |         |         |    |          |         |         |     |          |          |         |     |          |          |         |
| 10H | -1.84572                                                                                                                                                                                                                                                                                                                                                                                                                                                                                                                                                                                                                                                                                                                                                                                                                                                                                                                                                                                   | 0.7808   | 0.00000  |         |         |    |         |          |         |    |          |          |         |    |          |          |         |    |          |          |          |    |         |          |         |    |         |         |         |    |          |         |         |    |          |         |         |     |          |          |         |     |          |          |         |
|     | <p><i>cis</i>-CH<sub>3</sub>OPO...HNC<br/> <math>E_{\text{CCSD(T)}} = -624.337978</math>    <math>E_{\text{ZPVE}} = 0.064128</math></p> <table border="1"> <tbody> <tr><td>1P</td><td>1.45898</td><td>0.91249</td><td>0.00000</td></tr> <tr><td>2O</td><td>1.67304</td><td>-0.67587</td><td>0.00000</td></tr> <tr><td>3C</td><td>0.56521</td><td>-1.61628</td><td>0.00000</td></tr> <tr><td>4H</td><td>-0.04178</td><td>-1.46938</td><td>0.88896</td></tr> <tr><td>5H</td><td>-0.04178</td><td>-1.46938</td><td>-0.88896</td></tr> <tr><td>6H</td><td>1.01221</td><td>-2.60319</td><td>0.00000</td></tr> <tr><td>7O</td><td>0.00000</td><td>1.25762</td><td>0.00000</td></tr> <tr><td>8H</td><td>-1.61319</td><td>0.57145</td><td>0.00000</td></tr> <tr><td>9N</td><td>-2.47595</td><td>0.02857</td><td>0.00000</td></tr> <tr><td>10C</td><td>-3.44068</td><td>-0.64553</td><td>0.00000</td></tr> </tbody> </table>                                                                        | 1P       | 1.45898  | 0.91249 | 0.00000 | 2O | 1.67304 | -0.67587 | 0.00000 | 3C | 0.56521  | -1.61628 | 0.00000 | 4H | -0.04178 | -1.46938 | 0.88896 | 5H | -0.04178 | -1.46938 | -0.88896 | 6H | 1.01221 | -2.60319 | 0.00000 | 7O | 0.00000 | 1.25762 | 0.00000 | 8H | -1.61319 | 0.57145 | 0.00000 | 9N | -2.47595 | 0.02857 | 0.00000 | 10C | -3.44068 | -0.64553 | 0.00000 |     |          |          |         |
| 1P  | 1.45898                                                                                                                                                                                                                                                                                                                                                                                                                                                                                                                                                                                                                                                                                                                                                                                                                                                                                                                                                                                    | 0.91249  | 0.00000  |         |         |    |         |          |         |    |          |          |         |    |          |          |         |    |          |          |          |    |         |          |         |    |         |         |         |    |          |         |         |    |          |         |         |     |          |          |         |     |          |          |         |
| 2O  | 1.67304                                                                                                                                                                                                                                                                                                                                                                                                                                                                                                                                                                                                                                                                                                                                                                                                                                                                                                                                                                                    | -0.67587 | 0.00000  |         |         |    |         |          |         |    |          |          |         |    |          |          |         |    |          |          |          |    |         |          |         |    |         |         |         |    |          |         |         |    |          |         |         |     |          |          |         |     |          |          |         |
| 3C  | 0.56521                                                                                                                                                                                                                                                                                                                                                                                                                                                                                                                                                                                                                                                                                                                                                                                                                                                                                                                                                                                    | -1.61628 | 0.00000  |         |         |    |         |          |         |    |          |          |         |    |          |          |         |    |          |          |          |    |         |          |         |    |         |         |         |    |          |         |         |    |          |         |         |     |          |          |         |     |          |          |         |
| 4H  | -0.04178                                                                                                                                                                                                                                                                                                                                                                                                                                                                                                                                                                                                                                                                                                                                                                                                                                                                                                                                                                                   | -1.46938 | 0.88896  |         |         |    |         |          |         |    |          |          |         |    |          |          |         |    |          |          |          |    |         |          |         |    |         |         |         |    |          |         |         |    |          |         |         |     |          |          |         |     |          |          |         |
| 5H  | -0.04178                                                                                                                                                                                                                                                                                                                                                                                                                                                                                                                                                                                                                                                                                                                                                                                                                                                                                                                                                                                   | -1.46938 | -0.88896 |         |         |    |         |          |         |    |          |          |         |    |          |          |         |    |          |          |          |    |         |          |         |    |         |         |         |    |          |         |         |    |          |         |         |     |          |          |         |     |          |          |         |
| 6H  | 1.01221                                                                                                                                                                                                                                                                                                                                                                                                                                                                                                                                                                                                                                                                                                                                                                                                                                                                                                                                                                                    | -2.60319 | 0.00000  |         |         |    |         |          |         |    |          |          |         |    |          |          |         |    |          |          |          |    |         |          |         |    |         |         |         |    |          |         |         |    |          |         |         |     |          |          |         |     |          |          |         |
| 7O  | 0.00000                                                                                                                                                                                                                                                                                                                                                                                                                                                                                                                                                                                                                                                                                                                                                                                                                                                                                                                                                                                    | 1.25762  | 0.00000  |         |         |    |         |          |         |    |          |          |         |    |          |          |         |    |          |          |          |    |         |          |         |    |         |         |         |    |          |         |         |    |          |         |         |     |          |          |         |     |          |          |         |
| 8H  | -1.61319                                                                                                                                                                                                                                                                                                                                                                                                                                                                                                                                                                                                                                                                                                                                                                                                                                                                                                                                                                                   | 0.57145  | 0.00000  |         |         |    |         |          |         |    |          |          |         |    |          |          |         |    |          |          |          |    |         |          |         |    |         |         |         |    |          |         |         |    |          |         |         |     |          |          |         |     |          |          |         |
| 9N  | -2.47595                                                                                                                                                                                                                                                                                                                                                                                                                                                                                                                                                                                                                                                                                                                                                                                                                                                                                                                                                                                   | 0.02857  | 0.00000  |         |         |    |         |          |         |    |          |          |         |    |          |          |         |    |          |          |          |    |         |          |         |    |         |         |         |    |          |         |         |    |          |         |         |     |          |          |         |     |          |          |         |
| 10C | -3.44068                                                                                                                                                                                                                                                                                                                                                                                                                                                                                                                                                                                                                                                                                                                                                                                                                                                                                                                                                                                   | -0.64553 | 0.00000  |         |         |    |         |          |         |    |          |          |         |    |          |          |         |    |          |          |          |    |         |          |         |    |         |         |         |    |          |         |         |    |          |         |         |     |          |          |         |     |          |          |         |
|     | <p><i>cis</i>-CH<sub>3</sub>OPO...HCCH<br/> <math>E_{\text{CCSD(T)}} = -608.264462</math>    <math>E_{\text{ZPVE}} = 0.074319</math></p> <table border="1"> <tbody> <tr><td>1P</td><td>1.46664</td><td>1.16043</td><td>0.00000</td></tr> <tr><td>2O</td><td>1.79778</td><td>-0.40617</td><td>0.00000</td></tr> <tr><td>3C</td><td>0.75283</td><td>-1.41314</td><td>0.00000</td></tr> <tr><td>4H</td><td>0.13441</td><td>-1.30374</td><td>0.88627</td></tr> <tr><td>5H</td><td>0.13441</td><td>-1.30374</td><td>-0.88627</td></tr> <tr><td>6H</td><td>1.25943</td><td>-2.37138</td><td>0.00000</td></tr> <tr><td>7O</td><td>0.00000</td><td>1.40786</td><td>0.00000</td></tr> <tr><td>8C</td><td>-2.61953</td><td>-0.4083</td><td>0.00000</td></tr> <tr><td>9H</td><td>-1.88297</td><td>0.36503</td><td>0.00000</td></tr> <tr><td>10C</td><td>-3.44264</td><td>-1.30064</td><td>0.00000</td></tr> <tr><td>11H</td><td>-4.17108</td><td>-2.07365</td><td>0.00000</td></tr> </tbody> </table> | 1P       | 1.46664  | 1.16043 | 0.00000 | 2O | 1.79778 | -0.40617 | 0.00000 | 3C | 0.75283  | -1.41314 | 0.00000 | 4H | 0.13441  | -1.30374 | 0.88627 | 5H | 0.13441  | -1.30374 | -0.88627 | 6H | 1.25943 | -2.37138 | 0.00000 | 7O | 0.00000 | 1.40786 | 0.00000 | 8C | -2.61953 | -0.4083 | 0.00000 | 9H | -1.88297 | 0.36503 | 0.00000 | 10C | -3.44264 | -1.30064 | 0.00000 | 11H | -4.17108 | -2.07365 | 0.00000 |
| 1P  | 1.46664                                                                                                                                                                                                                                                                                                                                                                                                                                                                                                                                                                                                                                                                                                                                                                                                                                                                                                                                                                                    | 1.16043  | 0.00000  |         |         |    |         |          |         |    |          |          |         |    |          |          |         |    |          |          |          |    |         |          |         |    |         |         |         |    |          |         |         |    |          |         |         |     |          |          |         |     |          |          |         |
| 2O  | 1.79778                                                                                                                                                                                                                                                                                                                                                                                                                                                                                                                                                                                                                                                                                                                                                                                                                                                                                                                                                                                    | -0.40617 | 0.00000  |         |         |    |         |          |         |    |          |          |         |    |          |          |         |    |          |          |          |    |         |          |         |    |         |         |         |    |          |         |         |    |          |         |         |     |          |          |         |     |          |          |         |
| 3C  | 0.75283                                                                                                                                                                                                                                                                                                                                                                                                                                                                                                                                                                                                                                                                                                                                                                                                                                                                                                                                                                                    | -1.41314 | 0.00000  |         |         |    |         |          |         |    |          |          |         |    |          |          |         |    |          |          |          |    |         |          |         |    |         |         |         |    |          |         |         |    |          |         |         |     |          |          |         |     |          |          |         |
| 4H  | 0.13441                                                                                                                                                                                                                                                                                                                                                                                                                                                                                                                                                                                                                                                                                                                                                                                                                                                                                                                                                                                    | -1.30374 | 0.88627  |         |         |    |         |          |         |    |          |          |         |    |          |          |         |    |          |          |          |    |         |          |         |    |         |         |         |    |          |         |         |    |          |         |         |     |          |          |         |     |          |          |         |
| 5H  | 0.13441                                                                                                                                                                                                                                                                                                                                                                                                                                                                                                                                                                                                                                                                                                                                                                                                                                                                                                                                                                                    | -1.30374 | -0.88627 |         |         |    |         |          |         |    |          |          |         |    |          |          |         |    |          |          |          |    |         |          |         |    |         |         |         |    |          |         |         |    |          |         |         |     |          |          |         |     |          |          |         |
| 6H  | 1.25943                                                                                                                                                                                                                                                                                                                                                                                                                                                                                                                                                                                                                                                                                                                                                                                                                                                                                                                                                                                    | -2.37138 | 0.00000  |         |         |    |         |          |         |    |          |          |         |    |          |          |         |    |          |          |          |    |         |          |         |    |         |         |         |    |          |         |         |    |          |         |         |     |          |          |         |     |          |          |         |
| 7O  | 0.00000                                                                                                                                                                                                                                                                                                                                                                                                                                                                                                                                                                                                                                                                                                                                                                                                                                                                                                                                                                                    | 1.40786  | 0.00000  |         |         |    |         |          |         |    |          |          |         |    |          |          |         |    |          |          |          |    |         |          |         |    |         |         |         |    |          |         |         |    |          |         |         |     |          |          |         |     |          |          |         |
| 8C  | -2.61953                                                                                                                                                                                                                                                                                                                                                                                                                                                                                                                                                                                                                                                                                                                                                                                                                                                                                                                                                                                   | -0.4083  | 0.00000  |         |         |    |         |          |         |    |          |          |         |    |          |          |         |    |          |          |          |    |         |          |         |    |         |         |         |    |          |         |         |    |          |         |         |     |          |          |         |     |          |          |         |
| 9H  | -1.88297                                                                                                                                                                                                                                                                                                                                                                                                                                                                                                                                                                                                                                                                                                                                                                                                                                                                                                                                                                                   | 0.36503  | 0.00000  |         |         |    |         |          |         |    |          |          |         |    |          |          |         |    |          |          |          |    |         |          |         |    |         |         |         |    |          |         |         |    |          |         |         |     |          |          |         |     |          |          |         |
| 10C | -3.44264                                                                                                                                                                                                                                                                                                                                                                                                                                                                                                                                                                                                                                                                                                                                                                                                                                                                                                                                                                                   | -1.30064 | 0.00000  |         |         |    |         |          |         |    |          |          |         |    |          |          |         |    |          |          |          |    |         |          |         |    |         |         |         |    |          |         |         |    |          |         |         |     |          |          |         |     |          |          |         |
| 11H | -4.17108                                                                                                                                                                                                                                                                                                                                                                                                                                                                                                                                                                                                                                                                                                                                                                                                                                                                                                                                                                                   | -2.07365 | 0.00000  |         |         |    |         |          |         |    |          |          |         |    |          |          |         |    |          |          |          |    |         |          |         |    |         |         |         |    |          |         |         |    |          |         |         |     |          |          |         |     |          |          |         |

Table S4 Geometries (Å) and imaginary frequencies (cm<sup>-1</sup>) at the MP2/aug-cc-pVTZ level, total energies (a.u.) at the CCSD(T)/aug-cc-pV(T+d)Z//MP2/aug-cc-pVTZ level for the transition states.

|                                                                                     |                                                                                                                                                                                                                                                                                                                                                                                                                                                                                                                                                                                                                                                                                                                                                                                                                                                                                                                                                                                                                                                                                                           |             |             |            |             |   |             |            |             |   |             |            |             |   |             |            |             |   |             |             |             |   |             |             |             |   |             |             |             |   |             |             |             |   |             |             |             |   |             |             |             |   |            |            |            |
|-------------------------------------------------------------------------------------|-----------------------------------------------------------------------------------------------------------------------------------------------------------------------------------------------------------------------------------------------------------------------------------------------------------------------------------------------------------------------------------------------------------------------------------------------------------------------------------------------------------------------------------------------------------------------------------------------------------------------------------------------------------------------------------------------------------------------------------------------------------------------------------------------------------------------------------------------------------------------------------------------------------------------------------------------------------------------------------------------------------------------------------------------------------------------------------------------------------|-------------|-------------|------------|-------------|---|-------------|------------|-------------|---|-------------|------------|-------------|---|-------------|------------|-------------|---|-------------|-------------|-------------|---|-------------|-------------|-------------|---|-------------|-------------|-------------|---|-------------|-------------|-------------|---|-------------|-------------|-------------|---|-------------|-------------|-------------|---|------------|------------|------------|
| 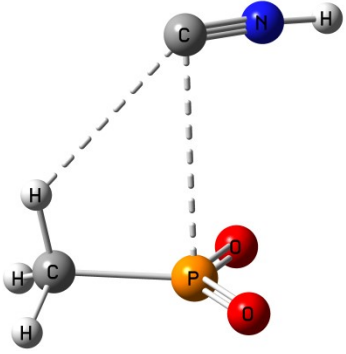   | <p>CH<sub>3</sub>PO<sub>2</sub>...HNC TSa freq = -83.53 cm<sup>-1</sup><br/> <i>E</i><sub>CCSD(T)</sub> = -624.34657 <i>E</i><sub>ZPVE</sub> = 0.061876</p> <table border="1"> <tbody> <tr><td>C</td><td>1.24261700</td><td>1.46597400</td><td>0.25654000</td></tr> <tr><td>H</td><td>0.37821000</td><td>2.04345500</td><td>-0.07276200</td></tr> <tr><td>H</td><td>2.09550200</td><td>1.69762300</td><td>-0.37444700</td></tr> <tr><td>H</td><td>1.44090500</td><td>1.66264500</td><td>1.30535200</td></tr> <tr><td>P</td><td>0.79772700</td><td>-0.26260800</td><td>0.04122400</td></tr> <tr><td>O</td><td>0.24250700</td><td>-0.91200300</td><td>1.24948400</td></tr> <tr><td>O</td><td>1.04530600</td><td>-0.79475300</td><td>-1.31484400</td></tr> <tr><td>H</td><td>-2.86967100</td><td>-0.99267300</td><td>0.37299500</td></tr> <tr><td>C</td><td>-2.12762300</td><td>0.87572700</td><td>-0.45157700</td></tr> <tr><td>N</td><td>-2.57190300</td><td>-0.12401100</td><td>-0.02234200</td></tr> </tbody> </table>                                                                                   | C           | 1.24261700  | 1.46597400 | 0.25654000  | H | 0.37821000  | 2.04345500 | -0.07276200 | H | 2.09550200  | 1.69762300 | -0.37444700 | H | 1.44090500  | 1.66264500 | 1.30535200  | P | 0.79772700  | -0.26260800 | 0.04122400  | O | 0.24250700  | -0.91200300 | 1.24948400  | O | 1.04530600  | -0.79475300 | -1.31484400 | H | -2.86967100 | -0.99267300 | 0.37299500  | C | -2.12762300 | 0.87572700  | -0.45157700 | N | -2.57190300 | -0.12401100 | -0.02234200 |   |            |            |            |
| C                                                                                   | 1.24261700                                                                                                                                                                                                                                                                                                                                                                                                                                                                                                                                                                                                                                                                                                                                                                                                                                                                                                                                                                                                                                                                                                | 1.46597400  | 0.25654000  |            |             |   |             |            |             |   |             |            |             |   |             |            |             |   |             |             |             |   |             |             |             |   |             |             |             |   |             |             |             |   |             |             |             |   |             |             |             |   |            |            |            |
| H                                                                                   | 0.37821000                                                                                                                                                                                                                                                                                                                                                                                                                                                                                                                                                                                                                                                                                                                                                                                                                                                                                                                                                                                                                                                                                                | 2.04345500  | -0.07276200 |            |             |   |             |            |             |   |             |            |             |   |             |            |             |   |             |             |             |   |             |             |             |   |             |             |             |   |             |             |             |   |             |             |             |   |             |             |             |   |            |            |            |
| H                                                                                   | 2.09550200                                                                                                                                                                                                                                                                                                                                                                                                                                                                                                                                                                                                                                                                                                                                                                                                                                                                                                                                                                                                                                                                                                | 1.69762300  | -0.37444700 |            |             |   |             |            |             |   |             |            |             |   |             |            |             |   |             |             |             |   |             |             |             |   |             |             |             |   |             |             |             |   |             |             |             |   |             |             |             |   |            |            |            |
| H                                                                                   | 1.44090500                                                                                                                                                                                                                                                                                                                                                                                                                                                                                                                                                                                                                                                                                                                                                                                                                                                                                                                                                                                                                                                                                                | 1.66264500  | 1.30535200  |            |             |   |             |            |             |   |             |            |             |   |             |            |             |   |             |             |             |   |             |             |             |   |             |             |             |   |             |             |             |   |             |             |             |   |             |             |             |   |            |            |            |
| P                                                                                   | 0.79772700                                                                                                                                                                                                                                                                                                                                                                                                                                                                                                                                                                                                                                                                                                                                                                                                                                                                                                                                                                                                                                                                                                | -0.26260800 | 0.04122400  |            |             |   |             |            |             |   |             |            |             |   |             |            |             |   |             |             |             |   |             |             |             |   |             |             |             |   |             |             |             |   |             |             |             |   |             |             |             |   |            |            |            |
| O                                                                                   | 0.24250700                                                                                                                                                                                                                                                                                                                                                                                                                                                                                                                                                                                                                                                                                                                                                                                                                                                                                                                                                                                                                                                                                                | -0.91200300 | 1.24948400  |            |             |   |             |            |             |   |             |            |             |   |             |            |             |   |             |             |             |   |             |             |             |   |             |             |             |   |             |             |             |   |             |             |             |   |             |             |             |   |            |            |            |
| O                                                                                   | 1.04530600                                                                                                                                                                                                                                                                                                                                                                                                                                                                                                                                                                                                                                                                                                                                                                                                                                                                                                                                                                                                                                                                                                | -0.79475300 | -1.31484400 |            |             |   |             |            |             |   |             |            |             |   |             |            |             |   |             |             |             |   |             |             |             |   |             |             |             |   |             |             |             |   |             |             |             |   |             |             |             |   |            |            |            |
| H                                                                                   | -2.86967100                                                                                                                                                                                                                                                                                                                                                                                                                                                                                                                                                                                                                                                                                                                                                                                                                                                                                                                                                                                                                                                                                               | -0.99267300 | 0.37299500  |            |             |   |             |            |             |   |             |            |             |   |             |            |             |   |             |             |             |   |             |             |             |   |             |             |             |   |             |             |             |   |             |             |             |   |             |             |             |   |            |            |            |
| C                                                                                   | -2.12762300                                                                                                                                                                                                                                                                                                                                                                                                                                                                                                                                                                                                                                                                                                                                                                                                                                                                                                                                                                                                                                                                                               | 0.87572700  | -0.45157700 |            |             |   |             |            |             |   |             |            |             |   |             |            |             |   |             |             |             |   |             |             |             |   |             |             |             |   |             |             |             |   |             |             |             |   |             |             |             |   |            |            |            |
| N                                                                                   | -2.57190300                                                                                                                                                                                                                                                                                                                                                                                                                                                                                                                                                                                                                                                                                                                                                                                                                                                                                                                                                                                                                                                                                               | -0.12401100 | -0.02234200 |            |             |   |             |            |             |   |             |            |             |   |             |            |             |   |             |             |             |   |             |             |             |   |             |             |             |   |             |             |             |   |             |             |             |   |             |             |             |   |            |            |            |
|   | <p>CH<sub>3</sub>OPO<sub>2</sub>...HNC TSb freq = -89.50 cm<sup>-1</sup><br/> <i>E</i><sub>CCSD(T)</sub> = -699.493175 <i>E</i><sub>ZPVE</sub> = 0.068227</p> <table border="1"> <tbody> <tr><td>C</td><td>-1.78157800</td><td>1.43254300</td><td>-0.14085100</td></tr> <tr><td>H</td><td>-2.46112800</td><td>0.97230700</td><td>0.56925800</td></tr> <tr><td>H</td><td>-2.32427600</td><td>1.95459500</td><td>-0.92018900</td></tr> <tr><td>H</td><td>-1.09285800</td><td>2.10003300</td><td>0.36844900</td></tr> <tr><td>O</td><td>-1.01179300</td><td>0.41092600</td><td>-0.83267200</td></tr> <tr><td>P</td><td>-0.33608700</td><td>-0.73650300</td><td>0.01235900</td></tr> <tr><td>O</td><td>-0.74388900</td><td>-0.80061800</td><td>1.42871400</td></tr> <tr><td>O</td><td>0.55664900</td><td>-1.58002200</td><td>-0.80089400</td></tr> <tr><td>H</td><td>3.17081100</td><td>-0.01622000</td><td>-0.33078300</td></tr> <tr><td>N</td><td>2.53760600</td><td>0.67308700</td><td>0.02249700</td></tr> <tr><td>C</td><td>1.71120800</td><td>1.41461200</td><td>0.40905300</td></tr> </tbody> </table> | C           | -1.78157800 | 1.43254300 | -0.14085100 | H | -2.46112800 | 0.97230700 | 0.56925800  | H | -2.32427600 | 1.95459500 | -0.92018900 | H | -1.09285800 | 2.10003300 | 0.36844900  | O | -1.01179300 | 0.41092600  | -0.83267200 | P | -0.33608700 | -0.73650300 | 0.01235900  | O | -0.74388900 | -0.80061800 | 1.42871400  | O | 0.55664900  | -1.58002200 | -0.80089400 | H | 3.17081100  | -0.01622000 | -0.33078300 | N | 2.53760600  | 0.67308700  | 0.02249700  | C | 1.71120800 | 1.41461200 | 0.40905300 |
| C                                                                                   | -1.78157800                                                                                                                                                                                                                                                                                                                                                                                                                                                                                                                                                                                                                                                                                                                                                                                                                                                                                                                                                                                                                                                                                               | 1.43254300  | -0.14085100 |            |             |   |             |            |             |   |             |            |             |   |             |            |             |   |             |             |             |   |             |             |             |   |             |             |             |   |             |             |             |   |             |             |             |   |             |             |             |   |            |            |            |
| H                                                                                   | -2.46112800                                                                                                                                                                                                                                                                                                                                                                                                                                                                                                                                                                                                                                                                                                                                                                                                                                                                                                                                                                                                                                                                                               | 0.97230700  | 0.56925800  |            |             |   |             |            |             |   |             |            |             |   |             |            |             |   |             |             |             |   |             |             |             |   |             |             |             |   |             |             |             |   |             |             |             |   |             |             |             |   |            |            |            |
| H                                                                                   | -2.32427600                                                                                                                                                                                                                                                                                                                                                                                                                                                                                                                                                                                                                                                                                                                                                                                                                                                                                                                                                                                                                                                                                               | 1.95459500  | -0.92018900 |            |             |   |             |            |             |   |             |            |             |   |             |            |             |   |             |             |             |   |             |             |             |   |             |             |             |   |             |             |             |   |             |             |             |   |             |             |             |   |            |            |            |
| H                                                                                   | -1.09285800                                                                                                                                                                                                                                                                                                                                                                                                                                                                                                                                                                                                                                                                                                                                                                                                                                                                                                                                                                                                                                                                                               | 2.10003300  | 0.36844900  |            |             |   |             |            |             |   |             |            |             |   |             |            |             |   |             |             |             |   |             |             |             |   |             |             |             |   |             |             |             |   |             |             |             |   |             |             |             |   |            |            |            |
| O                                                                                   | -1.01179300                                                                                                                                                                                                                                                                                                                                                                                                                                                                                                                                                                                                                                                                                                                                                                                                                                                                                                                                                                                                                                                                                               | 0.41092600  | -0.83267200 |            |             |   |             |            |             |   |             |            |             |   |             |            |             |   |             |             |             |   |             |             |             |   |             |             |             |   |             |             |             |   |             |             |             |   |             |             |             |   |            |            |            |
| P                                                                                   | -0.33608700                                                                                                                                                                                                                                                                                                                                                                                                                                                                                                                                                                                                                                                                                                                                                                                                                                                                                                                                                                                                                                                                                               | -0.73650300 | 0.01235900  |            |             |   |             |            |             |   |             |            |             |   |             |            |             |   |             |             |             |   |             |             |             |   |             |             |             |   |             |             |             |   |             |             |             |   |             |             |             |   |            |            |            |
| O                                                                                   | -0.74388900                                                                                                                                                                                                                                                                                                                                                                                                                                                                                                                                                                                                                                                                                                                                                                                                                                                                                                                                                                                                                                                                                               | -0.80061800 | 1.42871400  |            |             |   |             |            |             |   |             |            |             |   |             |            |             |   |             |             |             |   |             |             |             |   |             |             |             |   |             |             |             |   |             |             |             |   |             |             |             |   |            |            |            |
| O                                                                                   | 0.55664900                                                                                                                                                                                                                                                                                                                                                                                                                                                                                                                                                                                                                                                                                                                                                                                                                                                                                                                                                                                                                                                                                                | -1.58002200 | -0.80089400 |            |             |   |             |            |             |   |             |            |             |   |             |            |             |   |             |             |             |   |             |             |             |   |             |             |             |   |             |             |             |   |             |             |             |   |             |             |             |   |            |            |            |
| H                                                                                   | 3.17081100                                                                                                                                                                                                                                                                                                                                                                                                                                                                                                                                                                                                                                                                                                                                                                                                                                                                                                                                                                                                                                                                                                | -0.01622000 | -0.33078300 |            |             |   |             |            |             |   |             |            |             |   |             |            |             |   |             |             |             |   |             |             |             |   |             |             |             |   |             |             |             |   |             |             |             |   |             |             |             |   |            |            |            |
| N                                                                                   | 2.53760600                                                                                                                                                                                                                                                                                                                                                                                                                                                                                                                                                                                                                                                                                                                                                                                                                                                                                                                                                                                                                                                                                                | 0.67308700  | 0.02249700  |            |             |   |             |            |             |   |             |            |             |   |             |            |             |   |             |             |             |   |             |             |             |   |             |             |             |   |             |             |             |   |             |             |             |   |             |             |             |   |            |            |            |
| C                                                                                   | 1.71120800                                                                                                                                                                                                                                                                                                                                                                                                                                                                                                                                                                                                                                                                                                                                                                                                                                                                                                                                                                                                                                                                                                | 1.41461200  | 0.40905300  |            |             |   |             |            |             |   |             |            |             |   |             |            |             |   |             |             |             |   |             |             |             |   |             |             |             |   |             |             |             |   |             |             |             |   |             |             |             |   |            |            |            |
|  | <p>CH<sub>3</sub>PO<sub>2</sub>...H<sub>2</sub>O TSc freq = -33.43 cm<sup>-1</sup><br/> <i>E</i><sub>CCSD(T)</sub> = -607.435203 <i>E</i><sub>ZPVE</sub> = 0.069596</p> <table border="1"> <tbody> <tr><td>C</td><td>-0.21344900</td><td>1.57134800</td><td>-0.31001300</td></tr> <tr><td>H</td><td>0.81479200</td><td>1.66495600</td><td>0.03770400</td></tr> <tr><td>H</td><td>-0.88904100</td><td>2.21300900</td><td>0.24456100</td></tr> <tr><td>H</td><td>-0.24238200</td><td>1.79002100</td><td>-1.37568300</td></tr> <tr><td>P</td><td>-0.68086900</td><td>-0.14800200</td><td>-0.07994200</td></tr> <tr><td>O</td><td>0.17138600</td><td>-1.10120800</td><td>-0.82872000</td></tr> <tr><td>O</td><td>-1.84344500</td><td>-0.38157800</td><td>0.80005200</td></tr> <tr><td>O</td><td>2.48319700</td><td>0.00892500</td><td>0.45534400</td></tr> <tr><td>H</td><td>2.07705700</td><td>-0.66082300</td><td>-0.11224000</td></tr> <tr><td>H</td><td>3.24419800</td><td>-0.42433600</td><td>0.85145800</td></tr> </tbody> </table>                                                                     | C           | -0.21344900 | 1.57134800 | -0.31001300 | H | 0.81479200  | 1.66495600 | 0.03770400  | H | -0.88904100 | 2.21300900 | 0.24456100  | H | -0.24238200 | 1.79002100 | -1.37568300 | P | -0.68086900 | -0.14800200 | -0.07994200 | O | 0.17138600  | -1.10120800 | -0.82872000 | O | -1.84344500 | -0.38157800 | 0.80005200  | O | 2.48319700  | 0.00892500  | 0.45534400  | H | 2.07705700  | -0.66082300 | -0.11224000 | H | 3.24419800  | -0.42433600 | 0.85145800  |   |            |            |            |
| C                                                                                   | -0.21344900                                                                                                                                                                                                                                                                                                                                                                                                                                                                                                                                                                                                                                                                                                                                                                                                                                                                                                                                                                                                                                                                                               | 1.57134800  | -0.31001300 |            |             |   |             |            |             |   |             |            |             |   |             |            |             |   |             |             |             |   |             |             |             |   |             |             |             |   |             |             |             |   |             |             |             |   |             |             |             |   |            |            |            |
| H                                                                                   | 0.81479200                                                                                                                                                                                                                                                                                                                                                                                                                                                                                                                                                                                                                                                                                                                                                                                                                                                                                                                                                                                                                                                                                                | 1.66495600  | 0.03770400  |            |             |   |             |            |             |   |             |            |             |   |             |            |             |   |             |             |             |   |             |             |             |   |             |             |             |   |             |             |             |   |             |             |             |   |             |             |             |   |            |            |            |
| H                                                                                   | -0.88904100                                                                                                                                                                                                                                                                                                                                                                                                                                                                                                                                                                                                                                                                                                                                                                                                                                                                                                                                                                                                                                                                                               | 2.21300900  | 0.24456100  |            |             |   |             |            |             |   |             |            |             |   |             |            |             |   |             |             |             |   |             |             |             |   |             |             |             |   |             |             |             |   |             |             |             |   |             |             |             |   |            |            |            |
| H                                                                                   | -0.24238200                                                                                                                                                                                                                                                                                                                                                                                                                                                                                                                                                                                                                                                                                                                                                                                                                                                                                                                                                                                                                                                                                               | 1.79002100  | -1.37568300 |            |             |   |             |            |             |   |             |            |             |   |             |            |             |   |             |             |             |   |             |             |             |   |             |             |             |   |             |             |             |   |             |             |             |   |             |             |             |   |            |            |            |
| P                                                                                   | -0.68086900                                                                                                                                                                                                                                                                                                                                                                                                                                                                                                                                                                                                                                                                                                                                                                                                                                                                                                                                                                                                                                                                                               | -0.14800200 | -0.07994200 |            |             |   |             |            |             |   |             |            |             |   |             |            |             |   |             |             |             |   |             |             |             |   |             |             |             |   |             |             |             |   |             |             |             |   |             |             |             |   |            |            |            |
| O                                                                                   | 0.17138600                                                                                                                                                                                                                                                                                                                                                                                                                                                                                                                                                                                                                                                                                                                                                                                                                                                                                                                                                                                                                                                                                                | -1.10120800 | -0.82872000 |            |             |   |             |            |             |   |             |            |             |   |             |            |             |   |             |             |             |   |             |             |             |   |             |             |             |   |             |             |             |   |             |             |             |   |             |             |             |   |            |            |            |
| O                                                                                   | -1.84344500                                                                                                                                                                                                                                                                                                                                                                                                                                                                                                                                                                                                                                                                                                                                                                                                                                                                                                                                                                                                                                                                                               | -0.38157800 | 0.80005200  |            |             |   |             |            |             |   |             |            |             |   |             |            |             |   |             |             |             |   |             |             |             |   |             |             |             |   |             |             |             |   |             |             |             |   |             |             |             |   |            |            |            |
| O                                                                                   | 2.48319700                                                                                                                                                                                                                                                                                                                                                                                                                                                                                                                                                                                                                                                                                                                                                                                                                                                                                                                                                                                                                                                                                                | 0.00892500  | 0.45534400  |            |             |   |             |            |             |   |             |            |             |   |             |            |             |   |             |             |             |   |             |             |             |   |             |             |             |   |             |             |             |   |             |             |             |   |             |             |             |   |            |            |            |
| H                                                                                   | 2.07705700                                                                                                                                                                                                                                                                                                                                                                                                                                                                                                                                                                                                                                                                                                                                                                                                                                                                                                                                                                                                                                                                                                | -0.66082300 | -0.11224000 |            |             |   |             |            |             |   |             |            |             |   |             |            |             |   |             |             |             |   |             |             |             |   |             |             |             |   |             |             |             |   |             |             |             |   |             |             |             |   |            |            |            |
| H                                                                                   | 3.24419800                                                                                                                                                                                                                                                                                                                                                                                                                                                                                                                                                                                                                                                                                                                                                                                                                                                                                                                                                                                                                                                                                                | -0.42433600 | 0.85145800  |            |             |   |             |            |             |   |             |            |             |   |             |            |             |   |             |             |             |   |             |             |             |   |             |             |             |   |             |             |             |   |             |             |             |   |             |             |             |   |            |            |            |

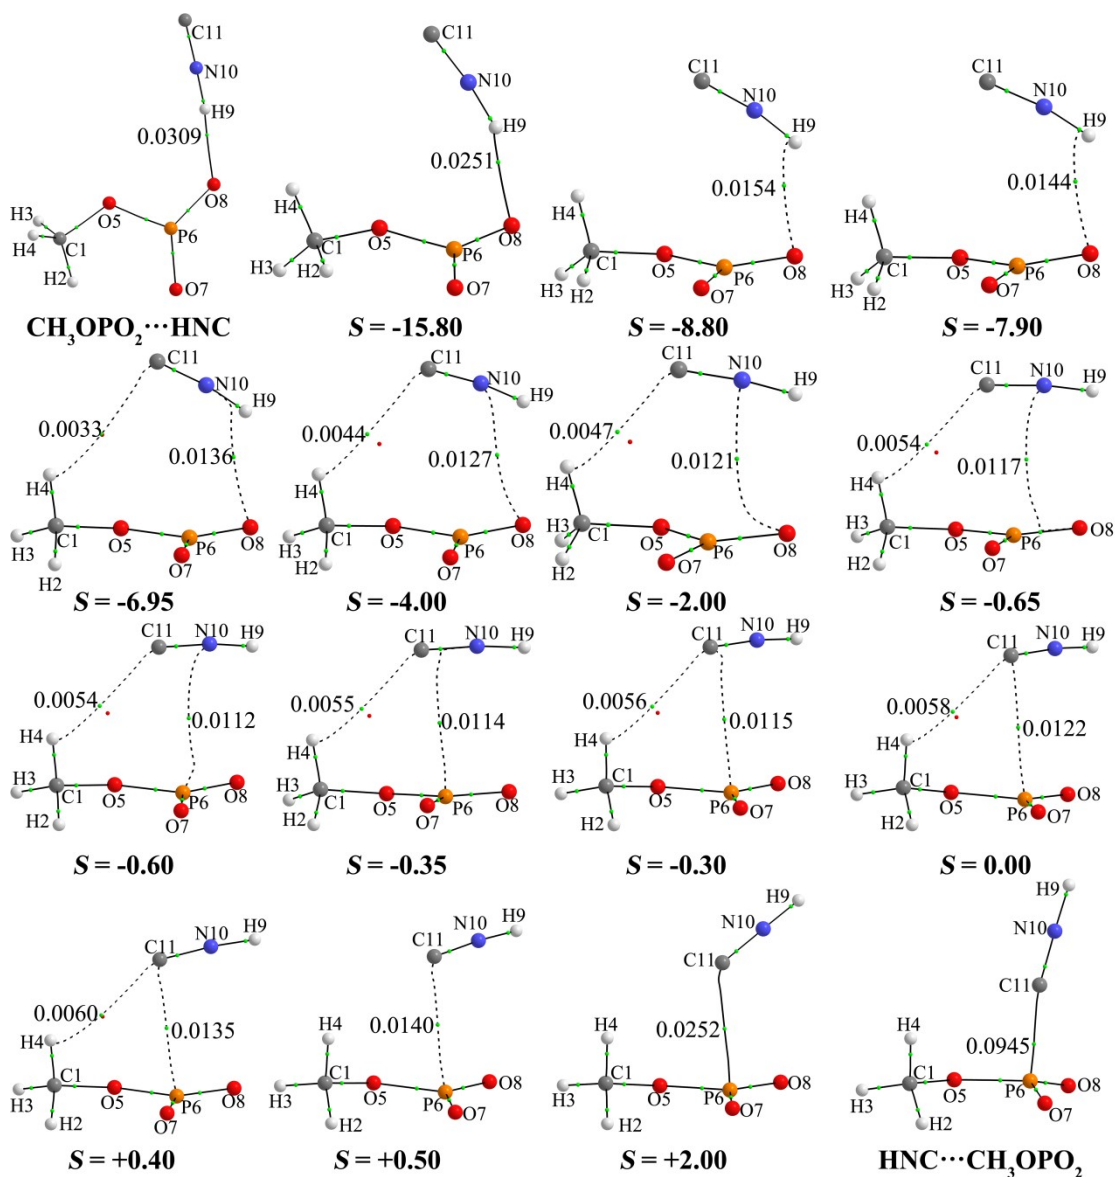

Figure S1. Molecular graphs of some points along the  $\text{CH}_3\text{OPO}_2 \cdots \text{HNC} \rightarrow \text{TSb} \rightarrow \text{HNC} \cdots \text{CH}_3\text{OPO}_2$  reaction pathway.
